# Supplementary material for: Short day transcriptomic programming during induction of dormancy in grapevine
Source: Front Plant Sci. 2015 Nov 4;6:834. doi: 10.3389/fpls.2015.00834 (PMC4632279; doi:10.3389/fpls.2015.00834)
Supplement: Supplementary file 6 [file Table6.XLSX]

## Sheet: Tempranillo axillary bud
Supplementary Table 6 A. Differentially expressed gene set in common between V. riparia short day (VRS) induced bud dormancy and genes differentially expressed from July to September transition in field grown V. vinifera (Tempranillo grapevine) axillary buds (Diaz-Riquelme et al., 2012). VRS up-regulated are in unshaded (top of table) and VRS down-regulated are in shaded (bottom).
VRS				Tempranillo
Affymetrix Probeset	Unique ID	Functional annotation	Network	Grapegen probeset	up- or down-regulation between July and September in Tempranillo
1617414_at	VIT_04s0008g04480	Zinc finger (C3HC4-type ring finger)	vv60078Other_zf-C3HC4	VVTU9484_s_at	up
1610369_at	VIT_06s0004g08080	Zinc finger (C3HC4-type ring finger)	vv60078Other_zf-C3HC4	VVTU19563_s_at	up
1609172_at	VIT_19s0014g03290	NAC domain containing protein 19	vv60046NAC	VVTU13940_s_at	down
1613912_at	VIT_08s0007g08250	Nuclear transcription factor Y subunit A-9	vv60021CCAAT	VVTU15501_at	up
1614493_at	VIT_14s0066g00140	RNA-binding protein RBP31	vv50133Primary_active_transporter_cat_A9_to_A18	VVTU3892_at	up
1620065_at	VIT_11s0016g04160	Sulfate transporter 3.5	vv50124Porters_cat_30_to_64	VVTU4678_at	down
1612725_at	VIT_08s0007g02240	Calcium/proton exchanger CAX3	vv50123Porters_cat_18_to_29	VVTU38378_s_at	up
1611014_at	VIT_15s0048g02350	Prohibitin 1	vv50108Accessory_factors_involved_in_transport	VVTU21548_s_at	up
1621477_s_at	VIT_05s0062g01160	Pectinesterase family	vv40006Cell_wall	VVTU38197_s_at	down
1622735_s_at	VIT_11s0052g01250	Xyloglucan endotransglucosylase/hydrolase 23	vv40006Cell_wall	VVTU1433_s_at	up
1614692_at	VIT_01s0010g00680	Heat shock protein 81-1	vv24141Protein_processing_in_endoplasmic_reticulum vv34626Plant-pathogen_interaction	VVTU37620_at	up
1621652_at	VIT_06s0004g05770	Heat shock protein 17.6 kDa class I	vv24141Protein_processing_in_endoplasmic_reticulum	VVTU14652_s_at	up
1610935_at	VIT_17s0000g03910	flavonoid 3-monooxygenase	vv10941Flavonoid_biosynthesis	VVTU6362_at	up
1611025_at	VIT_05s0062g00430	UDP-glucose:flavonoid 7-O-glucosyltransferase	vv10941Flavonoid_biosynthesis	VVTU15193_at	down
1614240_at	VIT_16s0050g00390	4-coumarate-CoA ligase	vv10940Phenylpropanoid_biosynthesis vv50104Group_translocators	VVTU35727_s_at	up
1607939_at	VIT_07s0031g00350	Caffeoyl-CoA O-methyltransferase 1	vv10940Phenylpropanoid_biosynthesis	VVTU18768_s_at	up
1611190_s_at	VIT_16s0100g01110	Resveratrol synthase (RS1)	vv10940Phenylpropanoid_biosynthesis	VVTU24741_x_at	up
1608306_at	VIT_17s0000g08460	Carbonic anhydrase, chloroplast precursor	vv10910Nitrogen_metabolism vv50124Porters_cat_30_to_64	VVTU37848_at	up
1622360_at	VIT_02s0033g00800	Nitrilase 4 (NIT4)	vv10910Nitrogen_metabolism	VVTU6947_at	up
1616961_at	VIT_06s0004g06790	Gibberellin 2-beta-dioxygenase 7	vv10904Diterpenoid_biosynthesis	VVTU1759_at	up
1612435_s_at	VIT_09s0002g04490	PDX1 (pyridoxine biosynthesis 1.3)	vv10750Vitamin_B6_metabolism	VVTU13220_at	down
1607647_at	VIT_03s0038g03400	Endochitinase 1, basic	vv10530Aminosugars_metabolism	VVTU34558_at	up
1622203_at	VIT_17s0119g00150	Alpha-amylase/subtilisin inhibitor	vv10500Starch_and_sucrose_metabolism	VVTU5898_s_at	down
1621885_at	VIT_06s0004g06210	CYP86A1		VVTU544_at	down
1614788_at	VIT_04s0023g02480	Dehydrin 1b		VVTU21791_s_at	up
1609165_at	VIT_07s0104g00420	Endo-1,3;1,4-beta-D-glucanase precursor		VVTU11942_s_at	down
1619192_at	GSVIVT01008368001	Glycosyl transferaseHGA1		VVTU38176_at	down
1611643_at	VIT_08s0007g02360	Harpin inducing protein 1-like 9		VVTU2928_at	down
1620985_at	VIT_16s0098g01060	Heat shock protein 26a, chloroplast		VVTU4901_at	down
1614762_at	TC70463	Hydroxyproline-rich glycoprotein GAS31 precursor		VVTU9901_s_at	up
1616775_at	VIT_17s0000g06290	Lipase GDSL		VVTU39580_at	down
1610894_at	VIT_08s0007g05720	No hit		VVTU6002_s_at	up
1612224_s_at	VIT_18s0001g08760	No hit		VVTU9858_s_at	up
1615641_at	VIT_08s0007g00950	No hit		VVTU1704_at	down
1616413_at	VIT_02s0025g04340	Osmotin		VVTU34671_s_at	up
1615959_at	VIT_18s0001g03880	Polcalcin		VVTU6011_at	up
1611927_at	VIT_02s0025g04060	Rab/Ypt GTPase Ara4-interacting protein		VVTU1412_at	down
1606746_a_at	VIT_13s0047g00110	Ripening regulated protein DDTFR8		VVTU2930_at	down
1607971_at	VIT_07s0031g01530	Stress enhanced protein 2 (SEP2)		VVTU12576_at	up
1620603_at	VIT_05s0020g04440	Unknown protein		VVTU4828_at	up
1610481_at	VIT_09s0002g04260	Unknown protein		VVTU2970_at	up
1618148_at	VIT_11s0016g05430	Unknown protein		VVTU5317_s_at	up
1611272_at	VIT_14s0006g01580	Unknown protein		VVTU14066_at	up
1611931_at	VIT_17s0000g00070	Unknown protein		VVTU8185_at	up
1619300_at	VIT_19s0014g03720	Unknown protein		VVTU7068_s_at	up
1615630_at	GSVIVT00024728001	Unknown protein		VVTU3405_at	down
1622372_s_at	GSVIVT00032572001	Unknown protein		VVTU17057_s_at	down
1611873_s_at	VIT_08s0007g00150	Zinc finger (C3HC4-type ring finger)	vv60078Other_zf-C3HC4	VVTU16611_at	down
1607620_at	VIT_08s0007g07670	NAC domain containing protein 47	vv60046NAC	VVTU15412_at	down
1607836_at	VIT_12s0028g00530	Cytochrome B561	vv50105Transport_electron_carriers	VVTU27890_at	down
1621755_at	VIT_03s0038g02140	Auxin transporter protein 2	vv50004Auxin_transport vv50123Porters_cat_18_to_29	VVTU5010_at	down
1614689_at	VIT_08s0007g03090	Kinesin family member 11	vv44810Regulation_of_actin_cytoskeleton	VVTU38078_at	down
1618654_at	VIT_14s0128g00440	Tangled	vv44110Cell_cycle	VVTU12122_at	down
1617785_at	VIT_16s0022g00870	Invertase/pectin methylesterase inhibitor	vv40006Cell_wall	VVTU13247_at	down
1619762_at	VIT_08s0040g01970	fasciclin arabinogalactan-protein (FLA11)	vv40006Cell_wall	VVTU13268_at	down
1609790_at	VIT_10s0003g02440	Xyloglucan endotransglucosylase/hydrolase 23	vv40006Cell_wall	VVTU13351_at	down
1622304_at	VIT_12s0028g02990	fasciclin arabinogalactan-protein (FLA13)	vv40006Cell_wall	VVTU3020_at	down
1613471_at	VIT_11s0052g01650	Pathogenesis-related protein 1 precursor (PRP 1)	vv30011Jasmonate_signaling vv34626Plant-pathogen_interaction	VVTU37412_s_at	down
1609591_at	VIT_16s0098g01150	Auxin-responsive SAUR29	vv30003Auxin_signaling	VVTU18738_s_at	down
1620679_at	VIT_17s0000g02680	ABA glucosidase	vv11013ABA_biosynthesis	VVTU1302_at	up
1610880_s_at	VIT_07s0129g00660	Indole-3-acetic acid-amido synthetase GH3.2	vv11002Auxin_biosynthesis	VVTU1335_at	down
1612157_at	VIT_13s0067g01970	Laccase	vv11000Single_reactions vv50109Incompletely_characterized_transport_systems	VVTU5464_at	down
1610346_at	VIT_13s0064g01640	Beta-primeverosidase	vv11000Single_reactions	VVTU26691_at	down
1608579_at	VIT_03s0180g00200	Limonoid UDP-glucosyltransferase	vv10940Phenylpropanoid_biosynthesis	VVTU17111_s_at	down
1613802_at	VIT_17s0000g00950	Hydroxycinnamoyl-CoA quinate hydroxycinnamoyltransferase	vv10940Phenylpropanoid_biosynthesis	VVTU5618_at	down
1608930_at	VIT_14s0128g00520	Alpha-L-fucosidase 2 precursor	vv10511N-Glycan_degradation	VVTU38141_s_at	down
1614514_at	VIT_13s0019g01180	Glucan endo-1,3-beta-glucosidase precursor	vv10500Starch_and_sucrose_metabolism	VVTU3118_s_at	down
1619909_at	VIT_08s0007g05000	S-adenosylmethionine synthetase	vv10271Methionine_metabolism vv10450Selenoamino_acid_metabolism	VVTU8738_s_at	down
1620623_at	VIT_04s0008g06670	Plastocyanin domain-containing protein	vv10195Photosynthesis vv50113Thylakoid_targeting_pathway	VVTU1491_s_at	down
1619011_at	VIT_15s0048g02720	fatty acid elongase	vv10061Fatty_acid_biosynthesis	VVTU38502_at	down
1618523_at	VIT_00s0304g00010	Unknown protein		VVTU2210_at	up
1611085_at	VIT_17s0000g07950	Unknown protein		VVTU10028_at	down
1619662_at	VIT_02s0154g00310	Protease inhibitor/seed storage/lipid transfer protein (LTP)		VVTU12570_at	down
1612573_at	VIT_13s0064g01340	Histone H3		VVTU12822_at	down
1620480_at	VIT_18s0075g00250	Unknown protein		VVTU13015_s_at	down
1615846_at	VIT_01s0011g02320	Unknown protein		VVTU13404_at	down
1613919_s_at	VIT_01s0011g05470	PGPS/D12		VVTU13910_s_at	down
1621903_at	VIT_05s0020g01830	UPF0497 family		VVTU1409_at	down
1616357_at	VIT_03s0038g03800	Protein kinase APK1B		VVTU15081_at	down
1614029_at	VIT_16s0050g02700	Receptor kinase homolog LRK10		VVTU16560_s_at	down
1621480_at	VIT_08s0007g00470	Rhomboid ATRBL1		VVTU17359_at	down
1612208_at	VIT_15s0048g02990	AAA-type ATPase		VVTU1814_at	down
1615403_at	VIT_15s0048g02990	AAA-type ATPase		VVTU1814_at	down
1621818_at	VIT_04s0008g03950	RD22		VVTU19655_s_at	down
1618944_at	VIT_04s0044g00560	Histone H3		VVTU2386_at	down
1621385_at	VIT_04s0044g01430	Unknown protein		VVTU2511_at	down
1615370_at	VIT_04s0023g03360	Unknown protein		VVTU2613_at	down
1617531_at	VIT_14s0066g00650	Transducin family protein / WD-40 repeat		VVTU27063_at	down
1615464_at	VIT_08s0007g06500	Unknown protein		VVTU2877_at	down
1621901_at	VIT_06s0004g00980	Dirigent protein pDIR9		VVTU3256_at	down
1610980_at	VIT_02s0154g00280	Arachidonic acid-induced DEA1		VVTU3324_at	down
1614219_at	VIT_06s0004g01690	Histone H3		VVTU34596_at	down
1620583_s_at	VIT_10s0003g00220	Unknown		VVTU35104_s_at	down
1615130_at	VIT_04s0043g00620	Lipase GDSL		VVTU3727_at	down
1615921_at	VIT_18s0001g13590	Leucine-rich repeat protein kinase		VVTU37892_at	down
1616038_at	TC52841	CTV.20		VVTU38208_s_at	down
1612735_at	VIT_12s0028g01640	S-receptor kinase		VVTU38576_at	down
1610648_s_at	VIT_18s0001g15120	Unknown protein		VVTU40324_at	down
1619323_at	VIT_18s0001g00040	Unknown protein		VVTU4291_at	down
1614442_at	VIT_13s0064g00560	DNA topoisomerase, ATP-hydrolyzing		VVTU4440_at	down
1616761_at	VIT_12s0028g03620	Unknown protein		VVTU4733_at	down
1620332_at	VIT_06s0004g01710	Histone H3		VVTU5506_s_at	down
1622328_at	VIT_12s0057g01000	Unknown protein		VVTU5786_at	down
1613076_at	VIT_13s0019g00800	Histone H4		VVTU668_x_at	down
1622440_at	VIT_18s0072g00800	Histone H3		VVTU7149_at	down
1610534_at	VIT_19s0014g03220	Unknown protein		VVTU8684_at	down
1607234_at	VIT_11s0065g00720	Serine carboxypeptidase S10		VVTU8710_at	down
1616738_at	VIT_14s0068g00510	Unknown		VVTU894_at	down
1614794_at	VIT_18s0001g10540	Dem protein		VVTU9156_at	down
1607184_at	VIT_16s0100g00570	Dehydration-responsive protein		VVTU9534_at	down
1622737_at	VIT_13s0019g05370	Histone H2B		VVTU9787_at	down

## Sheet: Leafy Spurge axillary bud
Supplementary Table 6 B. Differentially expressed gene set in common between V. riparia short day (VRS) induced bud dormancy and Euphorbia esula (leafy spurge) axillary bud endormancy induction and cambial SD dormancy induction responses in early and late hybrid poplar (Horvath et al., 2008). VRS upregulated are in unshaded (top of table) and VRS down regulated are in shaded (bottom).
VRS				Leafy spurge axillary bud
Probeset	Unique ID	Functional annotation	Network	Spurge ID	Clone	Trend para to endo
1611326_at	VIT_07s0104g00830	Sugar transporter ERD6-like 7	vv50121Porters_cat_1_to_6	3407	CV03_9.5151.C1.Contig5681	up	At2g48020
1619703_at	VIT_13s0067g00220	Aquaporin TMP-C	vv50101Channels_and_pores	7629	CV03_9.3299.C1.Contig3812	down	At4g00430
1613527_at	VIT_17s0000g06360	Alpha-expansin 3	vv30003Auxin_signaling	24455	CV03_9.2484.C1.Contig2952	up	At1g69530
1611847_at	VIT_06s0009g02810	Flavonoid 3',5'-hydroxylase	vv10941Flavonoid_biosynthesis	24503	CV03_9.4754.C1.Contig5296	down	At5g07990
1617284_at	VIT_12s0059g01750	Caffeic acid O-methyltransferase	vv10940Phenylpropanoid_biosynthesis	12851	CV03_9.4009.C1.Contig4524	down	At4g35160
1619450_s_at	VIT_16s0098g00850	Caffeic acid O-methyltransferase	vv10940Phenylpropanoid_biosynthesis	24013	CV03_9.3963.C2.Contig4483	down	At5g54160
1620930_s_at	VIT_13s0019g00840	UDP-glucuronate decarboxylase.	vv10500Starch_and_sucrose_metabolism vv10520Nucleotide_sugars_metabolism	9850	CV03_9.2954.C1.Contig3436	up	At3g46440
1612424_at	VIT_07s0005g00030	Glutathione S-transferase 8 GSTF8	vv10480Glutathione_metabolism	13892	CV03_9.sd.9.C1.Contig10402	up	At2g47730
1610206_at	VIT_08s0040g01710	Phenylalanine ammonia-lyase	vv10350Tyrosine_metabolism vv10360Phenylalanine_metabolism vv10910Nitrogen_metabolism vv10940Phenylpropanoid_biosynthesis	3306	CV03_9.3067.C1.Contig3554	down	At2g37040
1614836_s_at	VIT_07s0005g02230	S-adenosylmethionine synthetase 1 (SAM1)	vv10271Methionine_metabolism vv10450Selenoamino_acid_metabolism	4909	CV03_9.3509.C1.Contig4021	down	At4g01850
1612831_s_at	VIT_14s0060g01280	Pyrophosphate-energized vacuolar membrane proton pump	vv10190Oxidative_phosphorylation vv50133Primary_active_transporter_cat_A9_to_A18	10615	Cassava.513.C1.Contig650	up	At1g15690
1613017_s_at	VIT_19s0090g01000	VTC2 (vitamin C defective)	vv10053Ascorbate_and_aldarate_metabolism	295	CV03_9.5313.C1.Contig5841	down	At4g26850
1615814_at	VIT_01s0010g02460	Glyceraldehyde-3-phosphate dehydrogenase, cytosolic 3	vv10010Glycolysis	2771	CV03_9.1760.C1.Contig2183	up	At3g04120
1616444_at	VIT_06s0004g03390	TET3 (tetraspanin3)		14907	CV03_9.124.C1.Contig197	up	At3g45600
1615762_at	VIT_01s0127g00590	Protein disulfide isomerase		8145	CV03_9.6019.C1.Contig6504	down	At1g60420
1609267_at	VIT_06s0004g06210	CYP86A1		23417	CV03_9.3294.C1.Contig3808	down	At5g58860
1621671_at	VIT_06s0004g02950	Helicase conserved C-terminal domain containing protein		19194	CV03_9.2983.C1.Contig3467	down	At3g53400
1615959_at	VIT_18s0001g03880	Polcalcin		625	CV03_9.146.C1.Contig223	down	At1g24620
1611183_at	VIT_13s0019g03280	LIM domain containing protein	vv60040LIM	23491	CV03_9.6183.C1.Contig6648	down	At3g55770
1620688_at	VIT_01s0011g02960	Leucoanthocyanidin reductase 1	vv10941Flavonoid_biosynthesis	18406	CV03_9.9928.C1.Contig10102	down	At1g75290
1608191_at	VIT_08s0007g00440	Alpha-expansin 6 precursor	vv30003Auxin_signaling	5227	CV03_9.9468.C1.Contig9698	down	At2g28950
1619526_at	VIT_08s0105g00430	Omega-3 fatty acid desaturase, chloroplast precursor	vv11040Biosynthesis_of_unsaturated_fatty_acids	11777	CV03034B1F03.f1	down	At5g05580
1615926_at	CB345868	Thioredoxin M-type	0	8171	CV03_9.5206.C1.Contig5737	down	At3g15360

## Sheet: Populus terminal bud
Supplementary Table 6 C. Differentially expressed gene set in common between V. riparia short day (VRS) induced bud dormancy and Populus terminal buds with a significant Time x Genotype interaction (Ruttink et al., 2007). VRS upregulated are in unshaded (top of table) and VRS down regulated are in shaded (bottom).
VRS				Populus Terminal Bud
Probeset	Unique ID	Functional annotation	Network	Identifier	GeneModel	Closest AGI number	Annotation
1621565_s_at	VIT_04s0008g04480	Zinc finger (C3HC4-type ring finger)	vv60078Other_zf-C3HC4	PU08577	grail3.0013032202	At5g25560	zinc finger (C3HC4-type RING finger) family protein contains Pfam domain PF00097: Zinc finger, C3HC4 type (RING finger)
1620319_s_at	VIT_07s0005g03340	Myb domain protein 14	vv60044MYB	PU21351	gw1.XIII.43.1	At2g31180	myb family transcription factor (MYB14) similar to myb-related transcription factor GI:1370140 from [Lycopersicon esculentum]
1611672_at	VIT_06s0009g01710	NADH-cytochrome b5 reductase	vv50135Primary_active_transporter_cat_D3_to_E2	PU00024	estExt_Genewise1_v1.C_LG_X3270	At5g17770	NADH-cytochrome b5 reductase identical to NADH-cytochrome b5 reductase [Arabidopsis thaliana] GI:4240116
1612876_at	VIT_18s0001g11260	Nucleobase-ascorbate transporter 3 (NAT3)	vv50124Porters_cat_30_to_64	PU00822	gw1.40.581.1	At2g26510	xanthine/uracil permease family protein contains Pfam profile: PF00860 permease family
1607681_at	VIT_05s0049g00940	Inorganic phosphate transporter 1-4	vv50121Porters_cat_1_to_6	PU21870	fgenesh4_pg.C_scaffold_273000008	At2g38940	phosphate transporter (PT2) identical to phosphate transporter (AtPT2) [Arabidopsis thaliana] GI:1502430
1607945_at	VIT_14s0219g00230	Pectate lyase	vv40006Cell_wall	PU00627	eugene3.00120841	At4g24780	pectate lyase family protein similar to pectate lyase GP:14289169 from [Salix gilgiana]
1619280_at	VIT_10s0003g01560	Cellulose synthase CESA8	vv40006Cell_wall	PU07525	eugene3.00040363	At4g18780	cellulose synthase, catalytic subunit (IRX1) nearly identical to gi:12836997
1622791_at	VIT_07s0005g04110	Cellulose synthase CESA4	vv40006Cell_wall	PU07560	eugene3.00002636	At5g44030	cellulose synthase, catalytic subunit (IRX5) nearly identical to cellulose synthase [Arabidopsis thaliana] GI:27462651; contains Pfam profile PF03552: Cellulose synthase
1619581_at	VIT_07s0031g00260	Cyclin delta-3	vv30007Cytokinin_signaling vv44110Cell_cycle	PU09703	eugene3.00090666	At4g34090	expressed protein
1622301_at	VIT_10s0405g00040	Auxin-responsive protein	vv30003Auxin_signaling	PU07219	estExt_fgenesh4_pm.C_LG_VI0045	At5g47530	auxin-responsive protein, putative similar to auxin-induced protein AIR12 (GI:11357190) [Arabidopsis thaliana]; similar to stromal cell derived factor receptor 2 (GI:20381292) [Mus musculus]
1620438_at	GSVIVT00008223001	Beta-Expansin B1	vv30003Auxin_signaling	PU22483	fgenesh4_pg.C_scaffold_118000101	At4g17030	expansin-related identical to SWISS-PROT:O23547 expansin-related protein 1 precursor (At-EXPR1)[Arabidopsis thaliana]; related to expansins, http://www.bio.psu.edu/expansins/
1619430_s_at	VIT_18s0001g02510	Protein disulfide-isomerase A1	vv24141Protein_processing_in_endoplasmic_reticulum	PU06399	grail3.0003069401	At1g21750	protein disulfide isomerase, putative similar to SP|P29828 Protein disulfide isomerase precursor (PDI) (EC 5.3.4.1) {Medicago sativa}; isoform contains non-consensus GA donor splice site at intron 9
1610393_at	VIT_06s0004g05480	Translation initiation factor eIF-3 subunit 3	vv23013RNA_transport	PU02283	estExt_Genewise1_v1.C_LG_VIII0704	At3g11400	eukaryotic translation initiation factor 3G / eIF3g nearly identical to eukaryotic translation initiation factor 3g [Arabidopsis thaliana] GI:12407751
1621039_s_at	VIT_03s0017g01350	Ribosomal protein S6 (RPS6B) 40S	vv23010Ribosome vv34150mTOR_signaling_pathway	PU01989	estExt_fgenesh4_pg.C_LG_I2492	At5g10360	40S ribosomal protein S6 (RPS6B)
1620659_at	VIT_06s0080g00440	Ribosomal protein S9	vv23010Ribosome	PU23567	grail3.0079001501	At3g49080	ribosomal protein S9 family protein contains Pfam profile PF00380: ribosomal protein S9
1612157_at	VIT_13s0067g01970	Laccase	vv11000Single_reactions vv50109Incompletely_characterized_transport_systems	PU06128	estExt_fgenesh4_pm.C_LG_VIII0291	At2g40370	laccase, putative / diphenol oxidase, putative similar to laccase [Populus balsamifera subsp. trichocarpa][GI:3805960]
1621363_at	VIT_18s0001g13770	Cytochrome P450, family 83, subfamily B, polypeptide 1	vv10966Glucosinolate_biosynthesis	PU30629	eugene3.00020239	At4g31500	cytochrome P450 83B1 (CYP83B1) Identical to Cytochrome P450 (SP:O65782 )[Arabidopsis thaliana]
1621151_at	VIT_10s0003g00460	Isoflavone methyltransferase/ Orcinol O-methyltransferase 1 oomt1	vv10943Isoflavonoid_biosynthesis	PU04282	estExt_Genewise1_v1.C_410003	At4g35160	O-methyltransferase family 2 protein similar to caffeic acid O-methyltransferase, Pinus taeda, gb:U39301
1609307_at	VIT_11s0052g01090	4-coumarate-CoA ligase 2	vv10940Phenylpropanoid_biosynthesis vv50104Group_translocators	PU00246	grail3.0100002702	At1g51680	4-coumarate--CoA ligase 1 / 4-coumaroyl-CoA synthase 1 (4CL1) identical to SP|Q42524 4-coumarate--CoA ligase 1 (EC 6.2.1.12) (4CL 1) (4-coumaroyl-CoA synthase 1) {Arabidopsis thaliana}
1614423_at	VIT_09s0070g00240	Cinnamoyl-CoA reductase	vv10940Phenylpropanoid_biosynthesis	PU00591	estExt_fgenesh4_kg.C_LG_III0056	At1g15950	cinnamoyl-CoA reductase, putative nearly identical to CCR1 (GI:12034897), similar to cinnamoyl CoA reductase GI:2058310 from [Eucalyptus gunnii]
1614643_at	VIT_03s0063g00140	Caffeoyl-CoA O-methyltransferase	vv10940Phenylpropanoid_biosynthesis	PU01811	grail3.0001059501	At4g34050	caffeoyl-CoA 3-O-methyltransferase, putative nearly identical to GI:2960356 [Populus balsamifera subsp. trichocarpa], GI:684942 [Medicago sativa subsp. sativa] isoform contains a GT-TG intron which removes an internal segment of the protein.
1615753_at	TC56526	Caffeate 3-O-methyltransferase 1	vv10940Phenylpropanoid_biosynthesis	PU01944	estExt_fgenesh4_pm.C_LG_XII0129	At5g54160	quercetin 3-O-methyltransferase 1 / flavonol 3-O-methyltransferase 1 / caffeic acid/5-hydroxyferulic acid O-methyltransferase (OMT1) identical to O-methyltransferase 1 [Arabidopsis thaliana][GI:2781394], SP|Q9FK25 Quercetin 3-O-methyltransferase 1 (EC 2.1
1610070_at	GSVIVT00009232001	Stilbene synthase	vv10940Phenylpropanoid_biosynthesis	PU04294	estExt_fgenesh4_pg.C_LG_I0449	At5g13930	chalcone synthase / naringenin-chalcone synthase identical to SP|P13114
1613802_at	VIT_17s0000g00950	Hydroxycinnamoyl-CoA quinate hydroxycinnamoyltransferase	vv10940Phenylpropanoid_biosynthesis	PU09512	grail3.0005031901	At5g41040	transferase family protein similar to hypersensitivity-related gene product HSR201 - Nicotiana tabacum, EMBL:X95343; contains Pfam transferase family domain PF00248
1619235_at	VIT_04s0023g03040	Lactoylglutathione lyase	vv10620Pyruvate_metabolism	PU06513	gw1.III.803.1	At1g80160	lactoylglutathione lyase family protein / glyoxalase I family protein contains glyoxalase family protein domain, Pfam:PF00903
1614434_at	VIT_01s0011g05200	Phosphoethanolamine N-methyltransferase 1	vv10564Glycerophospholipid_metabolism	PU02348	gw1.XII.30.1	At1g48600	phosphoethanolamine N-methyltransferase 2, putative (NMT2) very similar to |PEM2_ARATH Putative phosphoethanolamine N-methyltransferase 2 (EC 2.1.1.103) (SP:Q944H0){Arabidopsis thaliana}; very similar to Halotolerance protein Hal3b (SP:P94063)[Arabidopsis
1610427_at	VIT_09s0002g02940	Myo-inositol oxygenase 1	vv10562Inositol_phosphate_metabolism	PU03161	gw1.VIII.2.1	At1g14520	oxygenase-related similar to myo-inositol oxygenase [Sus scrofa] gi|17432544|gb|AAL39076
1611876_s_at	VIT_15s0046g01570	Acidic endochitinase (CHIB1)	vv10530Aminosugars_metabolism	PU10496	estExt_Genewise1_v1.C_1970084	At5g24090	acidic endochitinase (CHIB1) identical to SP|P19172 Acidic endochitinase precursor (EC 3.2.1.14) {Arabidopsis thaliana}
1608930_at	VIT_14s0128g00520	Alpha-L-fucosidase 2 precursor	vv10511N-Glycan_degradation	PU21233	fgenesh4_pm.C_LG_I000242	At3g26430	GDSL-motif lipase/hydrolase family protein similar to early nodulin ENOD8 [Medicago sativa] GI:304037; contains InterPro Entry IPR001087 Lipolytic enzyme, G-D-S-L family
1620930_s_at	VIT_13s0019g00840	UDP-glucuronate decarboxylase.	vv10500Starch_and_sucrose_metabolism vv10520Nucleotide_sugars_metabolism	PU02592	estExt_Genewise1_v1.C_LG_I1353	At3g46440	NAD-dependent epimerase/dehydratase family protein similar to UDP-glucuronic acid decarboxylase Uxs1p from Filobasidiella neoformans GI:14318327; contains Pfam profile PF01370 NAD dependent epimerase/dehydratase family
1614622_at	VIT_02s0025g02120	1,4-alpha-D-glucan maltohydrolase	vv10500Starch_and_sucrose_metabolism	PU04102	estExt_fgenesh4_pm.C_LG_VIII0731	At3g23920	beta-amylase, putative / 1,4-alpha-D-glucan maltohydrolase, putative similar to beta-amylase enzyme [Arabidopsis thaliana] GI:6065749, beta-amylase PCT-BMYI from [Solanum tuberosum]; contains Pfam profile PF01373: Glycosyl hydrolase family 14
1613188_at	VIT_01s0026g01660	Alpha-amylase isozyme C2 precursor	vv10500Starch_and_sucrose_metabolism	PU07898	gw1.X.6063.1	At1g69830	alpha-amylase, putative / 1,4-alpha-D-glucan glucanohydrolase, putative similar to SP|P17859 Alpha-amylase precursor (EC 3.2.1.1) (1,4-alpha-D-glucan glucanohydrolase) {Vigna mungo}, alpha-amylase [Malus x domestica] GI:7532799; contains Pfam profile PF00
1622762_x_at	VIT_15s0046g01190	Hydroquinone glucosyltransferase	vv10500Starch_and_sucrose_metabolism	PU09329	estExt_fgenesh4_pg.C_LG_II1536	At4g01070	UDP-glucoronosyl/UDP-glucosyl transferase family protein contains Pfam profile: PF00201 UDP-glucoronosyl and UDP-glucosyl transferase
1617423_at	VIT_01s0026g01340	Glutathione S-transferase 29 GSTU18	vv10480Glutathione_metabolism	PU08802	eugene3.02130017	At1g10360	glutathione S-transferase, putative similar to glutathione S-transferase (sp|Q03666|GTX4_TOBAC); similar to EST gb|H36275 gb:AB039930.
1621431_at	VIT_06s0004g07770	Peroxidase	vv10360Phenylalanine_metabolism vv10680Methane_metabolism	PU20310	estExt_fgenesh4_pg.C_LG_XVI1240	At5g05340	peroxidase, putative similar to peroxidase [Nicotiana tabacum] gi|5381253|dbj|BAA82306; similar to Peroxidase P7 [Brassica rapa (Turnip)] SWISS-PROT:P00434
1619642_at	VIT_06s0004g02620	Phenylalanine ammonia-lyase	vv10350Tyrosine_metabolism vv10360Phenylalanine_metabolism vv10910Nitrogen_metabolism vv10940Phenylpropanoid_biosynthesis	PU02719	estExt_fgenesh4_pg.C_LG_VIII0293	At2g37040	phenylalanine ammonia-lyase 1 (PAL1) nearly identical to SP|P35510
1608615_at	VIT_15s0046g02300	Beta-cyanoalanine synthase	vv10272Cysteine_metabolism vv10450Selenoamino_acid_metabolism vv10920Sulfur_metabolism	PU30438	grail3.0039007102	At3g61440	cysteine synthase, putative / O-acetylserine (thiol)-lyase, putative / O-acetylserine sulfhydrylase, putative identical to cysteine synthase (EC 4.2.99.8) [Arabidopsis thaliana] GI:5824334; contains Pfam profile PF00291: Pyridoxal-phosphate dependent enzy
1614836_s_at	VIT_07s0005g02230	S-adenosylmethionine synthetase 1 (SAM1)	vv10271Methionine_metabolism vv10450Selenoamino_acid_metabolism	PU01693	grail3.0050014702	At4g01850	S-adenosylmethionine synthetase 2 (SAM2) identical to S-adenosylmethionine synthetase 2 (Methionine adenosyltransferase 2, AdoMet synthetase 2) [Arabidopsis thaliana] SWISS-PROT:P17562
1611875_at	VIT_02s0025g02560	O-succinylhomoserine sulfhydrylase	vv10271Methionine_metabolism vv10272Cysteine_metabolism vv10450Selenoamino_acid_metabolism vv10920Sulfur_metabolism	PU20129	estExt_Genewise1_v1.C_LG_I8346	At1g64660	Cys/Met metabolism pyridoxal-phosphate-dependent enzyme family protein similar to SP|P13254 Methionine gamma-lyase (EC 4.4.1.11) (L-methioninase) {Pseudomonas putida}; contains Pfam profile PF01053: Cys/Met metabolism PLP-dependent enzyme
1616136_at	VIT_06s0009g01080	5-methyltetrahydropteroyltriglutamate--homocysteine S-methyltransferase	vv10271Methionine_metabolism	PU28733	estExt_Genewise1_v1.C_LG_XIX1125	At5g17920	5-methyltetrahydropteroyltriglutamate--homocysteine methyltransferase / vitamin-B12-independent methionine synthase / cobalamin-independent methionine synthase (CIMS) identical to SP|O50008 5-methyltetrahydropteroyltriglutamate--homocysteine methyltransfe
1608251_at	VIT_17s0000g00920	Glutamate decarboxylase 1 (GAD 1)	vv10251Glutamate_metabolism vv10252Alanine_and_aspartate_metabolism vv10410Beta-alanine_metabolism vv10650Butanoate_metabolism	PU01310	grail3.0038018902	At5g17330	glutamate decarboxylase 1 (GAD 1) sp|Q42521
1608381_at	VIT_01s0011g03660	IMP dehydrogenase/GMP reductase	vv10230Purine_metabolism	PU28323	fgenesh4_pg.C_LG_X001128	At1g68440	expressed protein
1611924_at	VIT_19s0015g01760	Photosystem I reaction center subunit V (PSAG)	vv10195Photosynthesis vv50105Transport_electron_carriers	PU08992	eugene3.00013110	At1g55670	photosystem I reaction center subunit V, chloroplast, putative / PSI-G, putative (PSAG) identical to SP|Q9S7N7; similar to SP|Q00327 Photosystem I reaction center subunit V, chloroplast precursor (PSI-G) (Photosystem I 9 kDa protein) {Hordeum vulgare}; co
1617206_s_at	CB340600	Photosystem I subunit O (PSAO)	vv10195Photosynthesis	PU20028	estExt_Genewise1_v1.C_660408	At1g08380	expressed protein
1610003_a_at	VIT_05s0062g01000	Aldo/keto reductase	vv10040Pentose_glucuronate_interconversion vv10051Fructose_and_mannose_metabolism vv10052Galactose_metabolism vv10561Glycerolipid_metabolism vv10620Pyruvate_metabolism	PU03767	gw1.II.421.1	At1g60710	aldo/keto reductase family protein contains Pfam profile PF00248: oxidoreductase, aldo/keto reductase family
1608263_a_at	VIT_04s0044g01110	Alcohol dehydrogenase 6	vv10010Glycolysis vv10071Fatty_acid_metabolism vv10350Tyrosine_metabolism	PU00686	fgenesh4_pg.C_scaffold_70000003	At1g77120	alcohol dehydrogenase (ADH) identical to alcohol dehydrogenase GI:469467 from (Arabidopsis thaliana)
1616039_at	VIT_06s0004g04800	Triosephosphate isomerase, cytosolic	vv10010Glycolysis vv10051Fructose_and_mannose_metabolism vv10710Carbon_fixation	PU23645	grail3.0049021504	At3g55440	triosephosphate isomerase, cytosolic, putative strong similarity to triosephosphate isomerase, cytosolic from Petunia hybrida [SP|P48495], from Coptis japonica [SP|P21820]
1621817_at	VIT_01s0127g00530	Protein disulfide isomerase		PU00630	eugene3.00100431	At1g60420	DC1 domain-containing protein contains Pfam domain PF03107: DC1 domain
1610756_at	VIT_06s0004g01750	Polygalacturonase inhibitor protein		PU01221	fgenesh4_pg.C_LG_I000355	At3g20820	leucine-rich repeat family protein contains similarity to Cf-2.1 [Lycopersicon pimpinellifolium] gi|1184075|gb|AAC15779; contains leucine rich-repeat domains Pfam:PF00560, INTERPRO:IPR001611
1616444_at	VIT_06s0004g03390	TET3 (tetraspanin3)		PU02405	estExt_fgenesh4_pm.C_LG_IX0680	At3g45600	senescence-associated family protein similar to senescence-associated protein 5 [Hemerocallis hybrid cultivar] gi|3551954|gb|AAC34855
1609305_at	VIT_00s0250g00020	Protein tyrosine phosphatase		PU02598	gw1.X.2954.1	At3g52180	protein tyrosine phosphatase/kinase interaction sequence protein (PTPKIS1) identical to PTPKIS1 protein [Arabidopsis thaliana] GI:11595504; contains Pfam profile PF00782: Dual specificity phosphatase, catalytic domain
1610015_at	VIT_03s0063g02630	Unknown protein		PU03150	grail3.0003048501	At4g39235	expressed protein
1611931_at	VIT_17s0000g00070	Unknown protein		PU03845	estExt_fgenesh4_pg.C_LG_XII1067	At5g07330	expressed protein
1616972_at	VIT_03s0063g00710	Carboxyesterase 12; CXE12		PU04700	estExt_Genewise1_v1.C_LG_IX2088	At3g48690	expressed protein similar to PrMC3 [Pinus radiata] GI:5487873
1612135_at	VIT_06s0004g05950	Unknown protein		PU05250	grail3.0054013701	At5g58960	expressed protein contains Pfam profile PF04859: Plant protein of unknown function (DUF641
1622407_at	VIT_08s0007g04000	Unknown protein		PU05414	grail3.0015035301	At3g10020	expressed protein
1612252_at	VIT_18s0001g08890	Haemolysin-III related		PU06129	eugene3.00140028	At4g37680	expressed protein contains Pfam domain, PF03006: Uncharacterised protein family (Hly-III / UPF0073)
1620686_at	VIT_00s0238g00020	Unknown protein		PU06219	gw1.41.566.1	At1g33800	expressed protein contains Pfam profile PF04669: Protein of unknown function (DUF579)
1622734_at	VIT_09s0002g05730	Esterase		PU07150	eugene3.00030304	At1g52760	esterase/lipase/thioesterase family protein low similarity to monoglyceride lipase from [Homo sapiens] GI:14594904, [Mus musculus] GI:2632162; contains Interpro entry IPR000379
1606772_at	VIT_00s0194g00310	RNA-binding protein P67, Chloroplast		PU08917	gw1.XVI.617.1	At4g16390	chloroplastic RNA-binding protein P67, putative nearly identical to 67kD chloroplastic RNA-binding protein, P67 [Arabidopsis thaliana] GI:9755842
1609053_at	VIT_08s0007g01640_2	SOUL heme-binding		PU11186	estExt_Genewise1_v1.C_LG_XVI3417	At2g37970	SOUL heme-binding family protein weak similarity to SOUL protein [Mus musculus] GI:4886906; contains Pfam profile PF04832: SOUL heme-binding protein
1621671_at	VIT_06s0004g02950	Helicase conserved C-terminal domain containing protein		PU11821	grail3.0028016001	At3g53400	expressed protein
1612984_at	VIT_13s0106g00780	Hydrolase, alpha/beta fold		PU13499	estExt_fgenesh4_pm.C_LG_X1007	At2g36290	hydrolase, alpha/beta fold family protein
1606794_at	VIT_02s0025g04250	Osmotin		PU20289	grail3.0020019002	At4g11650	osmotin-like protein (OSM34) nearly identical to SP|P50700|OSL3_ARATH Osmotin-like protein OSM34 precursor {Arabidopsis thaliana}; contains Pfam profile PF00314: Thaumatin family
1615650_at	VIT_04s0210g00160	CYP87A3		PU21751	LG_V: 489214-489381	At1g12740	cytochrome P450 family protein similar to Cytochrome P450 90A1 (SP:Q42569) [Arabidopsis thaliana]
1607519_at	VIT_08s0007g04240	Late embryogenesis abundant protein		PU23329	eugene3.01290053	At2g36640	late embryogenesis abundant protein (ECP63) / LEA protein nearly identical to to LEA protein in group 3 [Arabidopsis thaliana] GI:1526424; contains Pfam profile PF02987: Late embryogenesis abundant protein
1620890_at	VIT_13s0067g01250	Em protein GEA6 (EM6)		PU23378	gw1.X.1681.1	At2g40170	Em-like protein GEA6 (EM6) identical toSP|Q02973 Em-like protein GEA6 {Arabidopsis thaliana}; contains Pfam profile PF00477: Small hydrophilic plant seed protein
1608715_at	VIT_09s0002g06070	Late embryogenesis abundant protein		PU23570	eugene3.00011051	At1g52690	late embryogenesis abundant protein, putative / LEA protein, putative similar to SP|P13934 Late embryogenesis abundant protein 76 (LEA 76) {Brassica napus}; contains Pfam profile PF02987: Late embryogenesis abundant protein
1611316_at	VIT_05s0020g03530	Late embryogenesis abundant protein D-34 (LEA D-34)		PU23776	grail3.0070008401	At3g22490	late embryogenesis abundant protein, putative / LEA protein, putative similar to LEA protein in group 5 (AtECP31) [Arabidopsis thaliana] GI:1526422; contains Pfam profile PF04927: Seed maturation protein
1616426_at	VIT_04s0008g03930	RD22		PU23874	estExt_Genewise1_v1.C_LG_XIX0239	At5g25610	dehydration-responsive protein (RD22) identical to SP|Q08298 Dehydration-responsive protein RD22 precursor {Arabidopsis thaliana}
1621912_at	VIT_06s0004g00970	Dirigent protein		PU26104	fgenesh4_pg.C_scaffold_3758000001	At1g58170	disease resistance-responsive protein-related / dirigent protein-related similar to dirigent protein [Thuja plicata] gi|6694699|gb|AAF25360; similar to pathogenesis-related protein [Pisum sativum] gi|4585273|gb|AAD25355
1616954_s_at	VIT_00s0415g00040	Glycine-rich protein		PU28399	gw1.XV.856.1	At2g22660	glycine-rich protein
1618148_at	VIT_11s0016g05430	Unknown protein		PU29965	eugene3.00002619	At5g20190	expressed protein
1618657_at	VIT_15s0046g02000	Polygalacturonase GH28	vv40006Cell_wall	PU00265	grail3.0039009101	At3g61490	glycoside hydrolase family 28 protein / polygalacturonase (pectinase) family protein weak similarity to SP|P27644 Polygalacturonase (EC 3.2.1.15) (Pectinase) {Agrobacterium tumefaciens}; contains PF00295: Glycosyl hydrolases family 28
1616453_at	VIT_18s0122g00550	Cyclin-dependent kinase B2;1	vv44110Cell_cycle	PU00348	estExt_fgenesh4_pm.C_LG_V0721	At1g76540	cell division control protein, putative similar to SWISS-PROT:Q38775, cell division control protein 2 homolog D [Antirrhinum majus]; contains protein kinase domain, Pfam:PF00069
1611979_at	VIT_02s0033g01120	Dehydration-responsive protein		PU00437	estExt_fgenesh4_pg.C_290313	At1g31850	dehydration-responsive protein, putative strong similarity to early-responsive to dehydration stress ERD3 protein [Arabidopsis thaliana] GI:15320410; contains Pfam profile PF03141: Putative methyltransferase
1606714_at	VIT_10s0003g05000	VTC2 (vitamin C defective)	vv10053Ascorbate_and_aldarate_metabolism	PU00741	grail3.0062001301	At4g26850	expressed protein
1608756_at	VIT_02s0025g00260	Polygalacturonase GH28	vv40006Cell_wall	PU00742	eugene3.00010865	At4g23500	glycoside hydrolase family 28 protein / polygalacturonase (pectinase) family protein weak similarity to SP|P27644 Polygalacturonase (EC 3.2.1.15) (Pectinase) {Agrobacterium tumefaciens}; contains PF00295: Glycosyl hydrolases family 28
1612044_s_at	VIT_12s0035g00330	AAA-type ATPase		PU01068	gw1.XIII.1714.1	At5g40010	AAA-type ATPase family protein contains Pfam profile: ATPase family PF00004
1619665_at	VIT_03s0038g02800	Cyclin B2;4	vv44110Cell_cycle	PU01217	estExt_fgenesh4_pm.C_LG_V0693	At1g76310	cyclin, putative similar to B-like cyclin GI:780267 from (Medicago sativa); contains Pfam profiles PF00134: Cyclin, N-terminal domain, PF02984: Cyclin, C-terminal domain
1617030_at	VIT_04s0008g00530	Serine/threonine-protein kinase Aurora-1	vv44110Cell_cycle	PU01275	estExt_fgenesh4_pg.C_LG_VI1609	At4g32830	protein kinase, putative similar to protein kinase p46XlEg22 [Xenopus laevis] gi|609280|emb|CAA78914; contains protein kinase domain, Pfam:PF00069
1614668_at	GSVIVT00007310001	Adenine phosphoribosyltransferase 1	vv10230Purine_metabolism	PU01360	estExt_fgenesh4_pg.C_1270057	At4g22570	adenine phosphoribosyltransferase, putative strong similarity to Adenine phosphoribosyltransferase [Hordeum vulgare subsp. vulgare] GI:9711921; contains Pfam profile PF00156: Phosphoribosyl transferase domain
1612064_at	VIT_13s0147g00230	Unknown protein		PU01746	eugene3.00080178	At3g54260	expressed protein various predicted proteins, Arabidopsis thaliana
1617467_at	VIT_14s0030g02170	Calcium-binding EF hand		PU01855	grail3.0070005201	At5g28830	calcium-binding EF hand family protein contains INTERPRO:IPR002048 calcium-binding EF-hand domain
1622009_at	VIT_00s0357g00100	Pollen Ole e 1 allergen and extensin		PU01910	estExt_Genewise1_v1.C_LG_II1134	At4g08685	pollen Ole e 1 allergen and extensin family protein contains Pfam domain, PF01190: Pollen proteins Ole e I family
1615753_at	TC56526	Caffeate 3-O-methyltransferase 1	vv10940Phenylpropanoid_biosynthesis	PU01944	estExt_fgenesh4_pm.C_LG_XII0129	At5g54160	quercetin 3-O-methyltransferase 1 / flavonol 3-O-methyltransferase 1 / caffeic acid/5-hydroxyferulic acid O-methyltransferase (OMT1) identical to O-methyltransferase 1 [Arabidopsis thaliana][GI:2781394], SP|Q9FK25 Quercetin 3-O-methyltransferase 1 (EC 2.1
1615370_at	VIT_04s0023g03360	Unknown protein		PU01954	eugene3.00570091	At5g66230	expressed protein
1608261_at	VIT_09s0002g00320	Pectinesterase PME3	vv40006Cell_wall	PU01960	estExt_fgenesh4_pm.C_290002	At3g14310	pectinesterase family protein contains Pfam profiles: PF01095 pectinesterase, PF04043 plant invertase/pectin methylesterase inhibitor ;similar to pectin methylesterase GB:Q42534 from [Arabidopsis thaliana]
1619210_at	VIT_06s0061g00750	Superoxide dismutase [Cu-Zn], chloroplast precursor	vv44146Peroxisome	PU02002	fgenesh4_pm.C_scaffold_163000009	At2g28190	superoxide dismutase [Cu-Zn], chloroplast (SODCP) / copper/zinc superoxide dismutase (CSD2) identical to GP:3273753:AF061519
1608571_s_at	GSVIVT00011190001	Protease inhibitor/seed storage/lipid transfer protein (LTP)		PU02011	estExt_fgenesh4_pg.C_LG_II2492	At5g48485	protease inhibitor/seed storage/lipid transfer protein (LTP) family protein contains Pfam protease inhibitor/seed storage/LTP family domain PF00234
1616898_at	VIT_01s0010g03510	Caffeoyl-CoA O-methyltransferase	vv10940Phenylpropanoid_biosynthesis	PU02140	estExt_fgenesh4_pg.C_LG_VIII1209	At1g67990	caffeoyl-CoA 3-O-methyltransferase, putative similar to GI:2960356 [Populus balsamifera subsp. trichocarpa], GI:684942 [Medicago sativa subsp. sativa]
1618107_at	VIT_06s0004g00610	Accelerated cell death 1 ACD1	vv50133Primary_active_transporter_cat_A9_to_A18	PU02280	fgenesh4_pg.C_LG_III001848	At4g25650	Rieske [2Fe-2S] domain-containing protein similar to cell death suppressor protein lls1 from Zea mays [gi:1935909], Rieske iron-sulfur protein Tic55 from Pisum sativum [gi:2764524]; contains Pfam PF00355 Rieske [2Fe-2S] domain
1608056_at	VIT_07s0104g00960	Histone H2AXb HTA3		PU02837	estExt_fgenesh4_pm.C_700058	At1g54690	histone H2A, putative strong similarity to histone H2A GI:3204129 SP|O65759 from Cicer arietinum, Picea abies SP|P35063; contains Pfam profile PF00125 Core histone H2A/H2B/H3/H4
1608714_at	VIT_08s0007g05060	ABC transporter B member 1	vv52010ABC_transporters	PU02945	gw1.28.733.1	At2g36910	multidrug resistance P-glycoprotein (PGP1) identical to P-glycoprotein GI:3849833 from [Arabidopsis thaliana]; homologous to mammalian mdr gene,contains ATP-binding cassette; related to multi drug resistance proteins
1608191_at	VIT_08s0007g00440	Alpha-expansin 6 precursor	vv30003Auxin_signaling	PU02960	estExt_Genewise1_v1.C_LG_I1253	At2g28950	expansin, putative (EXP6) similar to expansin GI:2828241 from [Brassica napus]; contains Pfam profile PF01357: Pollen allergen
1622292_at	VIT_05s0020g00420	Polygalacturonase GH28	vv40006Cell_wall	PU03036	gw1.X.736.1	At1g48100	glycoside hydrolase family 28 protein / polygalacturonase (pectinase) family protein similar to polygalacturonase PG1 GI:5669846, PG2 GI:5669848 from [Glycine max]; contains PF00295: Glycosyl hydrolases family 28 (polygalacturonases)
1615124_at	VIT_18s0041g02150	Lipase GDSL		PU03151	fgenesh4_pg.C_LG_X001247	At1g71691	GDSL-motif lipase/hydrolase family protein similar to family II lipases EXL3 GI:15054386, EXL1 GI:15054382 from [Arabidopsis thaliana]; contains Pfam profile: PF00657 Lipase Acylhydrolase with GDSL-like motif
1619168_at	VIT_00s0199g00050	2-oxoglutarate/malate carrier protein, Mitochondrial	vv50123Porters_cat_18_to_29	PU04417	estExt_fgenesh4_pm.C_LG_V0273	At2g22500	mitochondrial substrate carrier family protein contains Pfam profile: PF00153 mitochondrial carrier protein
1609818_at	VIT_05s0020g01910	1,4-alpha-D-glucan maltohydrolase	vv10500Starch_and_sucrose_metabolism	PU04549	gw1.VIII.1952.1	At5g18670	beta-amylase, putative (BMY3) / 1,4-alpha-D-glucan maltohydrolase, putative almost identical to beta-amylase BMY3 GI:15149457 from [Arabidopsis thaliana]; identical to cDNA putative beta-amylase BMY3 (BMY3) GI:15149456
1615201_at	VIT_11s0016g05840	Protease inhibitor/seed storage/lipid transfer protein (LTP)		PU04656	LG_XVIII: 12194211-12194536	At2g10940	protease inhibitor/seed storage/lipid transfer protein (LTP) family protein similar to proline-rich cell wall protein [Medicago sativa] GI:3818416; contains Pfam profile PF00234 Protease inhibitor/seed storage/LTP family
1607760_at	VIT_06s0009g02810	Flavonoid 3',5'-hydroxylase	vv10941Flavonoid_biosynthesis	PU05097	eugene3.00030242	At5g07990	flavonoid 3'-monooxygenase / flavonoid 3'-hydroxylase (F3'H) / cytochrome P450 75B1 (CYP75B1) / transparent testa 7 protein (TT7) identical to SP|Q9SD85 Flavonoid 3'-monooxygenase (EC 1.14.13.21) (Flavonoid 3'-hydroxylase) (AtF3'H) (Cytochrome P450 75B1)
1619526_at	VIT_08s0105g00430	Omega-3 fatty acid desaturase, chloroplast precursor	vv11040Biosynthesis_of_unsaturated_fatty_acids	PU05283	estExt_fgenesh4_pm.C_LG_VI0352	At5g05580	omega-3 fatty acid desaturase, chloroplast, temperature-sensitive (FAD8) identical to SP:48622 Temperature-sensitive omega-3 fatty acid desaturase, chloroplast precursor (EC 1.14.19.-) {Arabidopsis thaliana}; contains Pfam profile PF00487: Fatty acid desa
1620771_at	VIT_08s0040g00320	Alpha-L-arabinofuranosidase	vv10520Nucleotide_sugars_metabolism	PU05634	estExt_fgenesh4_pg.C_LG_XVI0181	At3g10740	glycosyl hydrolase family protein 51 similar to arabinoxylan arabinofuranohydrolase isoenzyme AXAH-II from GI:13398414 [Hordeum vulgare]
1607473_at	VIT_00s0189g00010	Unknown protein		PU05923	grail3.0021026801	At3g25130	expressed protein
1607099_s_at	VIT_08s0007g04150	RKL1 (Receptor-like kinase 1)		PU06125	eugene3.00280292	At2g36570	leucine-rich repeat transmembrane protein kinase, putative
1611613_at	VIT_16s0022g00670	Vacuolar invertase 1, GIN1	vv10052Galactose_metabolism vv10500Starch_and_sucrose_metabolism	PU06645	estExt_fgenesh4_pg.C_LG_III0902	At1g62660	beta-fructosidase (BFRUCT3) / beta-fructofuranosidase / invertase, vacuolar identical to beta-fructosidase GB:CAA67560 GI:1429209 [Arabidopsis thaliana]; supported by full-length cDNA GI:14517549; identical to cDNA Beta-fructosidase GI:3115854
1607505_s_at	VIT_01s0026g00220	Aldehyde dehydrogenase 1 precursor	vv10010Glycolysis vv10071Fatty_acid_metabolism vv10220Urea_cycle_and_metabolism_of_amino_groups vv10280Valine_leucine_and_isoleucine_degradation vv10340Histidine_metabolism vv10410Beta-alanine_metabolism vv10561Glycerolipid_metabolism vv10620Pyruvate_metabolism	PU06820	estExt_fgenesh4_pg.C_LG_XII0768	At3g48000	aldehyde dehydrogenase (ALDH2) identical to aldehyde dehydrogenase [Arabidopsis thaliana] GI:8574427; similar to mitochondrial aldehyde dehydrogenase [Arabidopsis thaliana] gi|19850249|gb|AAL99612; identical to cDNA aldehyde dehydrogenase AtALDH2a GI:2053
1617201_at	VIT_01s0011g05410	Invertase/pectin methylesterase inhibitor	vv40006Cell_wall	PU07119	gw1.X.6498.1	At1g14890	invertase/pectin methylesterase inhibitor family protein similar to pectinesterase GB:X85216 GI:732912 SP|Q43111 [Phaseolus vulgaris], SP|Q42534 from Arabidopsis thaliana; contains Pfam profile PF04043: Plant invertase/pectin methylesterase inhibitor
1608634_at	GSVIVT00003867001	F-box domain containing protein		PU07313	eugene3.00570057	At4g35930	expressed protein
1607752_at	VIT_01s0011g03210	Aspartyl protease		PU07602	eugene3.00101213	At1g25510	aspartyl protease family protein contains Pfam domain, PF00026: eukaryotic aspartyl protease
1611656_s_at	VIT_03s0038g00280	Cysteine proteinase		PU07684	grail3.0045008602	At4g39090	cysteine proteinase RD19a (RD19A) / thiol protease identical to cysteine proteinase RD19a, thiol protease SP:P43296, GI:435618 from [Arabidopsis thaliana]
1621456_at	VIT_01s0011g04080	Zinc finger (C3HC4-type ring finger)	vv60078Other_zf-C3HC4	PU07836	eugene3.00120446	At1g17970	zinc finger (C3HC4-type RING finger) family protein similar to Pfam domain, PF00097: Zinc finger, C3HC4 type (RING finger)
1617390_at	VIT_05s0020g02890	GPI-anchored protein-like protein II		PU07845	gw1.VIII.44.1	At3g06035	expressed protein
1616405_at	VIT_05s0029g00420	Nucleotide sugar epimerase	vv10500Starch_and_sucrose_metabolism vv10520Nucleotide_sugars_metabolism vv40006Cell_wall	PU07960	estExt_fgenesh4_pg.C_LG_I2408	At3g23820	NAD-dependent epimerase/dehydratase family protein similar to nucleotide sugar epimerase from Vibrio vulnificus GI:3093975 [PID:g3093975], WbnF [Escherichia coli] GI:5739472, CAPI protein {Staphylococcus aureus} SP|P39858; contains Pfam profile: PF01370 N
1620833_at	VIT_06s0004g01790	Zf A20 and AN1 domain-containing stress-associated protein 5	vv60077Other_zf-AN1	PU08127	eugene3.00011778	At3g12630	zinc finger (AN1-like) family protein contains Pfam domain, PF01428: AN1-like Zinc finger
1608299_at	VIT_11s0016g02170	FVE gene	vv30009Flower_development	PU08179	gw1.145.113.1	At2g19520	WD-40 repeat protein (MSI4) contains 6 (4 significant) WD-40 repeats (PF0400); identical to WD-40 repeat protein MSI4 (SP:O22607) [Arabidopsis thaliana]
1622565_at	VIT_03s0097g00710	Glutamyl-tRNA reductase 1	vv10860Porphyrin_and_chlorophyll_metabolism	PU08261	gw1.I.4290.1	At1g58290	glutamyl-tRNA reductase 1 / GluTR (HEMA1) identical to glutamyl-tRNA reductase 1, chloroplast [SP|P42804]
1613428_at	GSVIVT00012553001	Oxygen evolving enhancer 3 (PsbQ)	vv10195Photosynthesis vv50113Thylakoid_targeting_pathway vv50135Primary_active_transporter_cat_D3_to_E2	PU08604	estExt_fgenesh4_pm.C_LG_IV0060	At4g05180	oxygen-evolving enhancer protein 3, chloroplast, putative (PSBQ2) identical to SP|Q41932 Oxygen-evolving enhancer protein 3-2, chloroplast precursor (OEE3) (16 kDa subunit of oxygen evolving system of photosystem II) (OEC 16 kDa subunit) {Arabidopsis thal
1617280_s_at	VIT_06s0080g00760	Unknown protein		PU08683	estExt_fgenesh4_pg.C_LG_IX1364	At5g22430	expressed protein
1622249_at	VIT_10s0003g03830	S-2-hydroxy-acid oxidase, peroxisomal	vv10630Glyoxylate_and_dicarboxylate_metabolism vv44146Peroxisome	PU09108	estExt_fgenesh4_pg.C_LG_XI0474	At3g14420	(S)-2-hydroxy-acid oxidase, peroxisomal, putative / glycolate oxidase, putative / short chain alpha-hydroxy acid oxidase, putative similar to (S)-2-hydroxy-acid oxidase, peroxisomal (Glycolate oxidase, GOX) (Short chain alpha-hydroxy acid oxidase) [Spinac
1608799_at	VIT_04s0044g01000	Pectinesterase family	vv40006Cell_wall	PU09266	estExt_Genewise1_v1.C_LG_VII1401	At5g09760	pectinesterase family protein contains Pfam profile: PF01095 pectinesterase
1615130_at	VIT_04s0043g00620	Lipase GDSL		PU09305	eugene3.00190247	At5g33370	GDSL-motif lipase/hydrolase family protein similar to family II lipase EXL3 (GI:15054386), EXL1 (GI:15054382), EXL2 (GI:15054384) [Arabidopsis thaliana]; contains Pfam profile PF00657: Lipase/Acylhydrolase with GDSL-like motif
1619613_at	VIT_02s0154g00320	Protease inhibitor/seed storage/lipid transfer protein (LTP)		PU09413	grail3.0013041501	At2g45180	protease inhibitor/seed storage/lipid transfer protein (LTP) family protein similar to 14 kDa polypeptide [Catharanthus roseus] GI:407410; contains Pfam protease inhibitor/seed storage/LTP family domain PF00234
1613773_s_at	VIT_07s0141g00570	Photosystem II reaction centre W (PsbW)	vv10195Photosynthesis vv50135Primary_active_transporter_cat_D3_to_E2	PU09852	estExt_Genewise1_v1.C_LG_V1095	At2g30570	photosystem II reaction center W (PsbW) protein-related similar to photosystem II reaction center W protein SP:Q41387 from [Spinacia oleracea]
1606996_s_at	VIT_05s0049g01760	Proton gradient regulation 5 (PGR5)		PU10560	eugene3.00100370	At2g05620	expressed protein
1612625_at	VIT_00s0524g00010	Armadillo/beta-catenin repeat protein / U-box domain-containing protein		PU10906	estExt_fgenesh4_pg.C_LG_II2472	At3g07360	armadillo/beta-catenin repeat family protein / U-box domain-containing protein contains Pfam domain, PF00514: Armadillo/beta-catenin-like repeats and Pfam, PF04564: U-box domain
1618742_at	VIT_18s0041g01220	GCN5 N-acetyltransferase (GNAT)	vv60082GNAT	PU11087	gw1.70.142.1	At1g72030	GCN5-related N-acetyltransferase (GNAT) family protein contains Pfam profile PF00583: acetyltransferase, GNAT family
1610602_a_at	VIT_12s0028g00960	Phytoene synthase, chloroplast precursor	vv10100Biosynthesis_of_steroids vv10900Terpenoid_biosynthesis	PU11547	gw1.44.342.1	At5g17230	phytoene synthase (PSY) / geranylgeranyl-diphosphate geranylgeranyl transferase identical to GB:L25812; synonymous with geranylgeranyl-diphosphate geranylgeranyl transferase
1613776_at	VIT_18s0001g13930	Auxin response factor 5 (Transcription factor MONOPTEROS)	vv30003Auxin_signaling vv60004ARF	PU12041	grail3.0002064402	At1g19850	transcription factor MONOPTEROS (MP) / auxin-responsive protein (IAA24) / auxin response factor 5 (ARF5) identical to transcription factor MONOPTEROS (MP/IAA24/ARF5) SP:P93024 from [Arabidopsis thaliana]
1609765_s_at	VIT_02s0025g04720	Leucoanthocyanidin dioxgenase	vv10941Flavonoid_biosynthesis	PU12098	gw1.I.9239.1	At4g22880	leucoanthocyanidin dioxygenase, putative / anthocyanidin synthase, putative similar to SP|P51091 [Malus domestica]; contains PF03171 2OG-Fe(II) oxygenase superfamily
1613857_at	VIT_04s0008g00220	IAA6	vv30003Auxin_signaling vv60008AUXIAA	PU12241	grail3.0052008101	At3g16500	auxin-responsive AUX/IAA family protein similar to SP|O24408|AXII_ARATH Auxin-responsive protein IAA18 (Indoleacetic acid-induced protein 18) {Arabidopsis thaliana}; contains Pfam profile: PF02309: AUX/IAA family
1607874_at	VIT_05s0020g04510	GDP-mannose 3,5-epimerase 1	vv10053Ascorbate_and_aldarate_metabolism	PU12538	eugene3.00700070	At5g28840	NAD-dependent epimerase/dehydratase family protein similar to sugar epimerase BlmG from Streptomyces verticillus GI:9937230; contains Pfam profile PF01370 NAD dependent epimerase/dehydratase family
1611860_at	VIT_12s0055g01110	LHCB6 (light harvesting complex PSII)	vv10196Photosynthesis_antenna_proteins vv50105Transport_electron_carriers	PU12865	estExt_fgenesh4_kg.C_LG_III0002	At1g15820	chlorophyll A-B binding protein, chloroplast (LHCB6) nearly identical to Lhcb6 protein [Arabidopsis thaliana] GI:4741960; contains Pfam profile PF00504: Chlorophyll A-B binding protein
1614207_at	VIT_06s0004g06830	Asparagine synthetase	vv10910Nitrogen_metabolism	PU13003	estExt_fgenesh4_pm.C_LG_I0800	At3g47340	asparagine synthetase 1 [glutamine-hydrolyzing] / glutamine-dependent asparagine synthetase 1 (ASN1) identical to SP|P49078 Asparagine synthetase [glutamine-hydrolyzing] (EC 6.3.5.4) (Glutamine- dependent asparagine synthetase) {Arabidopsis thaliana}
1620688_at	VIT_01s0011g02960	Leucoanthocyanidin reductase 1	vv10941Flavonoid_biosynthesis	PU13089	grail3.0006037601	At1g75290	isoflavone reductase, putative similar to SP|P52577 Isoflavone reductase homolog P3 (EC 1.3.1.-) {Arabidopsis thaliana}; contains Pfam profile PF02716: Isoflavone reductase
1611004_at	VIT_11s0037g00290	Plastocyanin domain-containing protein	vv10195Photosynthesis vv50113Thylakoid_targeting_pathway	PU13102	gw1.VI.2580.1	At4g31840	plastocyanin-like domain-containing protein
1618504_at	VIT_15s0046g02560	GLABRA 3	vv44110Cell_cycle vv60011BHLH	PU13477	estExt_Genewise1_v1.C_LG_XIV1259	At5g41315	basic helix-loop-helix (bHLH) family protein contains Pfam profile: PF00010 helix-loop-helix DNA-binding domain ;annotation temporarily based on supporting cDNA gi|17224394|gb|AF246291.1|AF246291
1610299_at	VIT_01s0026g00570	Bet v I allergen		PU20036	estExt_Genewise1_v1.C_LG_X6115	At1g24020	Bet v I allergen family protein similar to major pollen allergen Bet v 1 GB:CAA96544 GI:1321726 from [Betula pendula]; contains Pfam profile PF00407: Pathogenesis-related protein Bet v I family
1614593_at	VIT_18s0089g01170	LHCB5 (light harvesting complex of photosystem ii 5)	vv10196Photosynthesis_antenna_proteins vv50105Transport_electron_carriers	PU20659	estExt_Genewise1_v1.C_1250189	At4g10340	chlorophyll A-B binding protein CP26, chloroplast / light-harvesting complex II protein 5 / LHCIIc (LHCB5) identical to SP|Q9XF89 Chlorophyll A/B-binding protein CP26, chloroplast precursor (Light-harvesting complex II protein 5) (LHCB5) (LHCIIc) {Arabido
1615915_at	VIT_04s0008g03820	Membrane protein		PU22039	eugene3.00570191	At2g25737	expressed protein contains Pfam profile: PF01925 domain of unknown function DUF81
1611890_at	VIT_05s0049g01080	Glutathione S-transferase 25 GSTU7	vv10480Glutathione_metabolism	PU22550	grail3.0036009801	At2g29420	glutathione S-transferase, putative
1621735_at	VIT_18s0001g12090	Unknown protein		PU23561	estExt_fgenesh4_pm.C_LG_IX0266	At1g47740	expressed protein
1612379_at	VIT_06s0004g01550	Phosphoribosylanthranilate transferase	vv10400Phenylalanine_tyrosine_and_tryptophan_biosynthesis	PU23583	LG_V: 2858400-2858553	At3g57880	C2 domain-containing protein contains INTERPRO:IPR000008 C2 domain
1610607_at	VIT_14s0108g00740	GASA4	vv30010Gibberellin_signaling	PU23640	estExt_fgenesh4_pg.C_LG_XVII0378	At5g15230	gibberellin-regulated protein 4 (GASA4) / gibberellin-responsive protein 4 identical to SP|P46690 Gibberellin-regulated protein 4 precursor {Arabidopsis thaliana}
1607852_at	VIT_00s0199g00210	Cyclin delta-2 (CYCD2)	vv44110Cell_cycle	PU24332	grail3.0017029801	At2g22490	cyclin delta-2 (CYCD2) identical to SP|P42752 Cyclin delta-2 {Arabidopsis thaliana}
1612070_at	VIT_10s0071g00870	High mobility group B 6	vv60035HMG	PU24480	estExt_fgenesh4_pg.C_LG_VII1313	At5g23420	high mobility group (HMG1/2) family protein similar to high mobility group protein 2 HMG2 [Ipomoea nil] GI:1052956; contains Pfam profile PF00505: HMG (high mobility group) box
1617668_at	VIT_02s0025g01220	High mobility group HMG1/2	vv60035HMG	PU24805	gw1.I.8656.1	At4g11080	high mobility group (HMG1/2) family protein similar to SP|P40618 High mobility group protein HMG2A {Gallus gallus}; contains Pfam profile PF00505: HMG (high mobility group) box
1613240_s_at	VIT_13s0067g00220	Aquaporin TMP-C	vv50101Channels_and_pores	PU25215	grail3.0049030302	At4g00430	plasma membrane intrinsic protein, putative identical to transmembrane protein GI:535780 from [Arabidopsis thaliana]; very strong similarity to SP|Q08733 Plasma membrane intrinsic protein 1C (Transmembrane protein B) (TMP-B) {Arabidopsis thaliana}; contai
1609324_at	VIT_19s0093g00220	Glutathione S-transferase 8 GSTU19	vv10480Glutathione_metabolism	PU25318	estExt_fgenesh4_pm.C_LG_XI0374	At1g78380	glutathione S-transferase, putative similar to glutathione transferase GI:2853219 from [Carica papaya]
1609679_at	VIT_01s0026g00350	Basic helix-loop-helix (bHLH) family	vv60011BHLH	PU25449	gw1.40.910.1	At1g60060	expressed protein
1609942_at	VIT_08s0007g08110	1-acyl-sn-glycerol-3-phosphate acyltransferase	vv10561Glycerolipid_metabolism vv10564Glycerophospholipid_metabolism vv10565Ether_lipid_metabolism	PU25454	fgenesh4_pg.C_LG_IX001042	At3g57650	acyl-CoA:1-acylglycerol-3-phosphate acyltransferase, putative similar to acyl-CoA:1-acylglycerol-3-phosphate acyltransferase GI:4583544 from [Brassica napus]
1619903_at	VIT_13s0019g04140	LHCA1	vv10196Photosynthesis_antenna_proteins vv34710Circadian_rhythm vv50105Transport_electron_carriers	PU25568	estExt_Genewise1_v1.C_LG_X2607	At3g54890	chlorophyll A-B binding protein / LHCI type I (CAB) identical to chlorophyll A/B-binding protein [Arabidopsis thaliana] GI:16207; contains Pfam profile: PF00504 chlorophyll A-B binding protein
1612911_at	VIT_05s0020g03650	Unknown protein		PU26569	gw1.X.5848.1	At3g22540	expressed protein
1611233_at	VIT_05s0077g01280	Glycosyl hydrolase family 3 beta xylosidase BXL1		PU26628	estExt_fgenesh4_pm.C_LG_X0551	At5g49360	glycosyl hydrolase family 3 protein
1610980_at	VIT_02s0154g00280	Arachidonic acid-induced DEA1		PU27331	grail3.0026027301	At1g12090	protease inhibitor/seed storage/lipid transfer protein (LTP) family protein similar to 14 kDa polypeptide [Catharanthus roseus] GI:407410; contains Pfam protease inhibitor/seed storage/LTP family domain PF00234
1616344_at	VIT_02s0025g04210	UDP-glucose 4-epimerase	vv10052Galactose_metabolism vv10520Nucleotide_sugars_metabolism	PU27394	estExt_fgenesh4_pg.C_LG_III1010	At1g12780	UDP-glucose 4-epimerase / UDP-galactose 4-epimerase / Galactowaldenase identical to SP|Q42605 [GB:CAA90941] from [Arabidopsis thaliana] (Arch. Biochem. Biophys. 327 (1), 27-34 (1996))
1621251_s_at	VIT_06s0061g00550	Xyloglucan endotransglucosylase/hydrolase 32	vv40006Cell_wall	PU27623	gw1.28.766.1	At2g36870	xyloglucan:xyloglucosyl transferase, putative / xyloglucan endotransglycosylase, putative / endo-xyloglucan transferase, putative similar to cellulase (xyloglucan endo-transglycosylase) GI:311835 from [Tropaeolum majus]
1616158_at	VIT_01s0137g00240	Pectate lyase	vv40006Cell_wall	PU29068	eugene3.00081702	At1g67750	pectate lyase family protein similar to pectate lyase GI:14289169 from [Salix gilgiana]
1610218_s_at	VIT_01s0011g00690	UDP-glucose 6-dehydrogenase	vv10040Pentose_glucuronate_interconversion vv10500Starch_and_sucrose_metabolism vv10520Nucleotide_sugars_metabolism vv40006Cell_wall	PU30200	eugene3.00101501	At5g15490	UDP-glucose 6-dehydrogenase, putative very strong similarity to SP|Q96558 UDP-glucose 6-dehydrogenase (EC 1.1.1.22) (UDP-Glc dehydrogenase) (UDP-GlcDH) (UDPGDH) {Glycine max}; contains Pfam profiles PF03721: UDP-glucose/GDP-mannose dehydrogenase family NA
1617781_at	VIT_00s0357g00090	Unknown protein		PU30258	grail3.0026015702	At5g10150	expressed protein
1622108_at	VIT_02s0154g00080	Multi-copper oxidase (SKU5)	vv50109Incompletely_characterized_transport_systems	PU30352	estExt_fgenesh4_pg.C_1270047	At4g12420	multi-copper oxidase, putative (SKU5) identical to multi-copper oxidase-related protein (SKU5)(GI:18158154) [Arabidopsis thaliana]; similar to pollen-specific protein precursor - common tobacco, PIR2:S22495; contains Pfam profile: PF00394 Multicopper oxid
1622534_at	VIT_04s0044g01410	Photosystem I reaction center subunit N (PSAN)	vv10195Photosynthesis vv50105Transport_electron_carriers	PU30958	estExt_Genewise1_v1.C_LG_V2453	At5g64040	photosystem I reaction center subunit PSI-N, chloroplast, putative / PSI-N, putative (PSAN) SP:P49107; Plant Physiol. 109 (3), 1126 (1995); similar to SP|P31093 Photosystem I reaction centre subunit N, chloroplast precursor (PSI- N) {Hordeum vulgare}
1622891_at	VIT_12s0059g01320	Glucan endo-1,3-beta-glucosidase 7 precursor	vv10500Starch_and_sucrose_metabolism	PU31056	eugene3.00002053	At2g05790	glycosyl hydrolase family 17 protein similar to elicitor inducible chitinase Nt-SubE76 GI:11071974 from [Nicotiana tabacum]

## Sheet: Chestnut  terminal bud
Supplementary Table 6 D. Differentially expressed gene set in common between V. riparia short day (VRS) induced bud dormancy and Castanea sativa (chestnut) dormant buds (Santamaria et al., 2011). VRS upregulated are in unshaded (top of table) and VRS down regulated are in shaded (bottom).
VRS				Chestnut Terminal Bud
Probe Set ID	Unique ID	Functional annotation	VitisNet Network	Chestnut GenBank Accn	Best Arabidopsis match
1608317_at	VIT_10s0042g01250	NPR1-like protein 3	vv60093TRAF	HO847281	AT5G45110
1620682_at	VIT_01s0026g02540	Zinc finger (C3HC4-type ring finger)	vv60078Other_zf-C3HC4	HO847076	AT1G26800
1606678_at	VIT_08s0007g07640	NAC domain-containing protein 87	vv60046NAC	HO847088	AT5G18270
1621922_at	VIT_09s0002g01590	Nuclear transcription factor Y subunit A-8	vv60021CCAAT	HO847190	AT1G72830
1621529_at	VIT_19s0015g01300	Amino acid permease 7	vv50123Porters_cat_18_to_29	HO847082	AT5G23810
1618261_at	VIT_01s0011g03400	Proton-dependent oligopeptide transport (POT) family protein	vv50122Porters_cat_7_to_17	HO847275	AT1G68570
1610938_at	VIT_00s0710g00020	SNF1-related protein kinase 2.7 SNRK2.7 SRK2F	vv30001ABA_signaling	HO847233	AT4G33950
1609818_at	VIT_05s0020g01910	1,4-alpha-D-glucan maltohydrolase	vv10500Starch_and_sucrose_metabolism	HO847270	AT5G18670
1609818_at	VIT_05s0020g01910	1,4-alpha-D-glucan maltohydrolase	vv10500Starch_and_sucrose_metabolism	HO847289	AT5G18670
1609818_at	VIT_05s0020g01910	1,4-alpha-D-glucan maltohydrolase	vv10500Starch_and_sucrose_metabolism	HO847314	AT5G18670
1606597_at	VIT_18s0001g08230	Receptor-like protein kinase HAIKU2		HO847098	AT1G09970
1618148_at	VIT_11s0016g05430	Unknown protein		HO847154	AT5G20190
1622714_at	VIT_12s0028g00830	Pleckstriny (PH) domain-containing protein		HO847195	AT2G30880
1615639_a_at	VIT_05s0094g01520	Late embryogenesis abundant protein		HO847317	AT2G44060
1607519_at	VIT_08s0007g04240	Late embryogenesis abundant protein		HO847256	AT2G36640
1611931_at	VIT_17s0000g00070	Unknown protein		HO847077	AT5G07330
1611931_at	VIT_17s0000g00070	Unknown protein		HO847186	AT5G07330
1620890_at	VIT_13s0067g01250	Em protein GEA6 (EM6)		HO847095	AT2G40170
1619828_at	VIT_08s0007g05990	Beta 1-3 glucanase		HO847313	AT3G57270
1622599_s_at	VIT_00s0225g00020	Ribosomal protein L27A (RPL27aC) 60S	vv23010Ribosome	HO847177	AT1G70600
1613165_s_at	VIT_16s0100g00290	L-idonate dehydrogenase	vv10051Fructose_and_mannose_metabolism	HO847109	AT5G51970
1613540_s_at	VIT_02s0025g01720	GDA2		HO847161	AT5G42050
1621903_at	VIT_05s0020g01830	UPF0497 family		HO847165	AT4G15610
1621903_at	VIT_05s0020g01830	UPF0497 family		HO847185	AT4G15610
1616191_s_at	VIT_06s0004g08150	Trans-cinnamate 4-monooxygenase	vv10360Phenylalanine_metabolism vv10940Phenylpropanoid_biosynthesis	HO847320	AT2G30490
1616191_s_at	VIT_06s0004g08150	Trans-cinnamate 4-monooxygenase	vv10360Phenylalanine_metabolism vv10940Phenylpropanoid_biosynthesis	HO847320	AT2G30490
1616191_s_at	VIT_06s0004g08150	Trans-cinnamate 4-monooxygenase	vv10360Phenylalanine_metabolism vv10940Phenylpropanoid_biosynthesis	HO847320	AT2G30490
1606794_at	VIT_02s0025g04250	Osmotin		HO847153	AT4G11650
1613301_at	VIT_00s0561g00020	Stem-specific protein TSJT1		HO847220	AT4G27450

## Sheet: Oak  terminal bud
Supplementary Table 6E. Genes DE in V. riparia dormant buds that correspond to genes up regulated during dormancy in Quercas petraea (oak) buds (Ueno et al., 2013). VRS upregulated are in unshaded (top of table) and VRS down regulated are in shaded (bottom).
VRS				Oak terminal bud
Probeset	Unique ID	V. Vinifera V1 annotation	VitisNet Network	Quercas Unique ID	Best AT match
1622887_at	BQ798787	ferredoxin, chloroplast (PETF)	vv10195Photosynthesis	F0SUT5C01A002S.l.qr.1	AT1G60950.1
1618107_at	VIT_06s0004g00610	Accelerated cell death 1 ACD1	vv50133Primary_active_transporter_cat_A9_to_A18	F0SUT5C01B30UJ.l.qr.1	AT4G25650.2
1611972_s_at	VIT_08s0058g00180	Male sterility 2 (MS2)		F0SUT5C01DZR0E.l.qr.1	AT3G11980.1
1608571_s_at	GSVIVT00011190001	Protease inhibitor/seed storage/lipid transfer protein (LTP)		F0SUT5C01A0X4M.l.qr.1	AT5G48485.1
1610299_at	VIT_01s0026g00570	Bet v I allergen		F0SUT5C01A6HGQ.l.qr.1	AT1G24020.1
1607739_at	VIT_04s0023g03370	Flavonone- 3-hydroxylase	vv10941Flavonoid_biosynthesis	F0SUT5C01AJ13Q.l.qr.1	AT3G51240.1
1615130_at	VIT_04s0043g00620	Lipase GDSL		F0SUT5C01A1XCO.l.qr.1	AT5G33370.1
1618245_at	VIT_06s0061g01380	Pop3 peptide -CBF transcription factor		F0SUT5C01A4NDP.l.qr.1	AT5G22580.1
1618245_at	VIT_06s0061g01380	Invertase/pectin methylesterase inhibitor	vv40006Cell_wall	F0SUT5C01A3QOH.l.qr.1	AT5G20740.1
1617280_s_at	VIT_06s0080g00760	Unknown protein		F0SUT5C01A21JS.l.qr.1	AT5G22430.1
1621351_s_at	VIT_12s0028g00320	LHB1B1	vv10196Photosynthesis_antenna_proteins vv50105Transport_electron_carriers vv50113Thylakoid_targeting_pathway	F0SUT5C01A0E1C.l.qr.1	AT2G34430.1
1613113_at	VIT_13s0019g04460	Phenylalanine ammonia-lyase 2 (PAL2)	vv10350Tyrosine_metabolism vv10360Phenylalanine_metabolism vv10910Nitrogen_metabolism vv10940Phenylpropanoid_biosynthesis	F0SUT5C01A7D5N.l.qr.1	AT3G53260.1
1610346_at	VIT_13s0064g01640	Beta-primeverosidase? Vitiscyc - beta-glucosidase	vv11000Single_reactions	F0SUT5C01A0137.l.qr.1	AT2G44480.2
1611086_at	VIT_16s0050g00830	Beta-ketoacyl-CoA synthase	vv10061Fatty_acid_biosynthesis	F0SUT5C01ANUFZ.l.qr.1	AT5G23940.1
1615481_at	VIT_18s0001g09400	Cytochrome b5 DIF-F		F0SUT5C01A3WMP.l.qr.1	AT5G48810.1

## Sheet: Populus cambium
Supplementary Table 6 F. Differentially expressed gene set in common between V. riparia short day (VRS) induced bud dormancy and Populus cambium dormancy induction responses in early and late hybrid poplar (Resman et al., 2010). VRS upregulated are in unshaded (top of table) and VRS down regulated are in shaded (bottom).
VRS				Populus cambium
Probeset	Unique ID	Functional annotation	VitisNet Molecular Network (Grimplet et al. 2012)	Identifier	GeneModel	Closest AGI number	Annotation
1606573_s_at	VIT_13s0064g01210	Zf A20 and AN1 domain-containing stress-associated protein 2	vv60077Other_zf-AN1	PU06464	estExt_fgenesh4_kg.C_LG_III0059	At1g51200	Identical to Zinc finger A20 and AN1 domain-containing stress-associated protein 2 (SAP2) [Arabidopsis Thaliana] (GB:Q8H0X0
1608709_at, 1612011_s_at	VIT_06s0004g04980	Scarecrow transcription factor 14 (SCL14)	vv60032GRAS	PU04078	estExt_Genewise1_v1.C_LG_IX4165	At1g07530	similar to scarecrow transcription factor family protein [Arabidopsis thaliana] (TAIR:AT2G29060.1)
1621922_at	VIT_09s0002g01590	Nuclear transcription factor Y subunit A-8	vv60021CCAAT	PU03099	estExt_fgenesh4_pg.C_LG_XVIII0020	At1g72830	Encodes a subunit of CCAAT-binding complex, binds to CCAAT box motif present in some plant promoter sequences. One of three members of this class (HAP2A, HAP2B, HAP2C), it is expressed in vegetative and reproductive tissues.
1609200_at	VIT_13s0019g03490	Zinc finger (CCCH-type) family protein	vv60018C3H	PU02539	estExt_fgenesh4_pg.C_280105	At2g20280	similar to putative uncharacterized hypothalamus protein HT010 [Oryza sativa (japonica cultivar-group)] (GB:BAD73384.1)
1616757_at	VIT_18s0001g05810	Cytochrome c	vv50135Primary_active_transporter_cat_D3_to_E2	PU02759	eugene3.00410190	At4g10040	Encodes cytochrome c. Promoter directs preferential expression in vascular tissues of cotyledons, leaves, roots, and hypocotyls, and in anthers.
1619139_at	VIT_07s0005g04240	Import receptor subunit TOM22 homolog 2, Mitochondrial	vv50132Primary_active_transporter_cat_A5_to_A8	PU05608	estExt_fgenesh4_pg.C_LG_II2554	At5g43970	Identical to Mitochondrial import receptor subunit TOM22 homolog 2 (TOM22-2) [Arabidopsis Thaliana] (GB:Q9FNC9)
1620209_at	VIT_19s0177g00300	Glucose 6 phosphate/phosphate translocator-like protein	vv50122Porters_cat_7_to_17	PU07657	eugene3.00111115	At5g54800	glucose6-Phosphate/phosphate transporter 1
1620256_at	VIT_18s0001g08210	SUT4 (sucrose transporter 4)	vv50121Porters_cat_1_to_6	PU03511	eugene3.00020985	At1g09960	low affinity (10mM) sucrose transporter in sieve elements (phloem)
1610875_at	VIT_10s0003g05630	Coatomer subunit epsilon	vv50110Protein_coat	PU00587	estExt_fgenesh4_pg.C_LG_XI1337	At1g30630	Identical to Coatomer subunit epsilon-1 [Arabidopsis Thaliana] (GB:Q9SA78
1615503_at	VIT_17s0000g07190	Heat shock protein 101	vv50109Incompletely_characterized_transport_systems	PU00672	estExt_Genewise1_v1.C_820051	At1g74310	Encodes ClpB1, which belongs to the Casein lytic proteinase/heat shock protein 100 (Clp/Hsp100) family. Involved in refolding of proteins which form aggregates under heat stress. Also known as AtHsp101. AtHsp101 is a cytosolic heat shock protein required for acclimation to high temperature.
1614456_at	VIT_11s0118g00230	ATSYTE/NTMC2T2.1/NTMC2TYPE2.1/SYTE	vv50109Incompletely_characterized_transport_systems	PU08281	gw1.XVIII.34.1	At5g11100	similar to ATSYTE/NTMC2T2.1/NTMC2TYPE2.1/SYTE [Arabidopsis thaliana] (TAIR:AT1G05500.1)
1614206_at	VIT_01s0127g00060	Alpha-glucan water dikinase, chloroplast precursor	vv50108Accessory_factors_involved_in_transport	PU25753	gw1.X.5281.1	At1g10760	-glucan, water dikinase required for starch degradation. Involved in cold-induced freezing tolerance. Mutations that eliminate the GWD protein or affect the dikinase domain of the enzyme dramatically reduce both the amount of phosphate in the amylopectin
1611014_at	VIT_15s0048g02350	Prohibitin 1	vv50108Accessory_factors_involved_in_transport	PU06384	estExt_fgenesh4_pm.C_LG_VII0042	At4g28510	similar to ATPHB6 (PROHIBITIN 6) [Arabidopsis thaliana] (TAIR:AT2G20530.1)
1617656_at	VIT_06s0004g04700	Outer envelope protein 16	vv50101Channels_and_pores	PU03461	estExt_Genewise1_v1.C_LG_I1289	At2g28900	Encodes AtOEP16, a 16-KDa plastid outer membrane protein involved in plastid import of protochlorophyllide oxidoreductase A. Predominantly expressed in leaves and is also inducible by cold treatment.
1617166_s_at	VIT_13s0019g04280	Aquaporin PIP2B	vv50101Channels_and_pores	PU07549	estExt_fgenesh4_pg.C_280159	At2g37170	water channel
1616957_s_at	VIT_19s0014g02870	Cellulase	vv40006Cell_wall	PU03243	gw1.VIII.377.1	At1g13130	similar to glycosyl hydrolase family 5 protein / cellulase family protein [Arabidopsis thaliana] (TAIR:AT3G26140.1)
1622791_at	VIT_07s0005g04110	Cellulose synthase CESA4	vv40006Cell_wall	PU07560	eugene3.00002636	At5g44030	Encodes a cellulose synthase involved in secondary cell wall biosynthesis. Confers resistance towards bacterial and fungal pathogens, independent of salicylic acid, ethylene and jasmonate signaling.
1607945_at	VIT_14s0219g00230	Pectate lyase	vv40006Cell_wall	PU06413	eugene3.00150667	At4g24780	Identical to Probable pectate lyase 18 precursor [Arabidopsis Thaliana] (GB:Q9C5M8
*1613281_at	VIT_05s0020g03470	Hydroxyproline-rich glycoprotein	vv40006Cell_wall	PU23526	fgenesh4_pg.C_LG_XVIII000655	At3g22440	similar to hydroxyproline-rich glycoprotein family protein [Arabidopsis thaliana] (TAIR:AT4G14900.1)
1622301_at	VIT_10s0405g00040	Auxin-responsive protein	vv30003Auxin_signaling	PU07219	estExt_fgenesh4_pm.C_LG_VI0045	At5g47530	similar to auxin-responsive family protein [Arabidopsis thaliana] (TAIR:AT4G17280.1)
1613527_at	VIT_17s0000g06360	Alpha-expansin 3	vv30003Auxin_signaling	PU12881	grail3.0010018901	At1g69530	Identical to Expansin-A1 precursor (EXPA1) [Arabidopsis Thaliana] (GB:Q9C554
*1619145_s_at	VIT_13s0047g00250	EIN3	vv30001ABA_signaling vv30008Ethylene_signaling vv30009Flower_development vv60027EIL	PU08374	fgenesh4_pg.C_LG_VIII000091	At3g20770	ethylene-insensitive3
1618066_a_at	VIT_16s0050g01150	Heat shock protein 90-1	vv24141Protein_processing_in_endoplasmic_reticulum vv34626Plant-pathogen_interaction	PU21958	eugene3.00040817	At5g52640	Encodes a cytosolic heat shock protein AtHSP90.1. AtHSP90.1 interacts with disease resistance signaling components SGT1b and RAR1 and is required for RPS2-mediated resistance.
1621652_at	VIT_06s0004g05770	Heat shock protein 17.6 kDa class I	vv24141Protein_processing_in_endoplasmic_reticulum	PU23381	grail3.0066002801	At2g29500	similar to 17.8 kDa class I heat shock protein (HSP17.8-CI) [Arabidopsis thaliana] (TAIR:AT1G07400.1)
*1606924_a_at	VIT_15s0046g01400	Ubiquitin-conjugating enzyme E2 D/E	vv24120Ubiquitin_mediated_proteolysis vv24141Protein_processing_in_endoplasmic_reticulum	PU28094	estExt_Genewise1_v1.C_LG_I8663	At1g64230
1608591_at	VIT_05s0020g01130	DEAD/DEAH box helicase	vv23040Spliceosome vv50133Primary_active_transporter_cat_A9_to_A18	PU27972	estExt_fgenesh4_pg.C_LG_X0052	At3g06980	Identical to DEAD-box ATP-dependent RNA helicase 50 (RH50) [Arabidopsis Thaliana] (GB:Q8GUG7
1607016_at	VIT_07s0104g00160	Small nuclear ribonucleoprotein D1	vv23040Spliceosome	PU01784	estExt_fgenesh4_pm.C_LG_II0256	At4g02840	similar to small nuclear ribonucleoprotein D1, putative / snRNP core protein D1, putative / Sm protein D1, putative [Arabidopsis thaliana] (TAIR:AT3G07590.1)
1611700_at	VIT_05s0094g00450	Ribosomal protein L51/S25/CI-B8	vv23010Ribosome	PU06918	estExt_fgenesh4_kg.C_1420002	At3g59650	similar to Unknown protein [Oryza sativa (japonica cultivar-group)] (GB:AAN77300.1)
1612458_at	VIT_16s0013g02020	Ribosomal protein L15e	vv23010Ribosome	PU00899	grail3.0096009401	At4g16720	Identical to 60S ribosomal protein L15-1 (RPL15A) [Arabidopsis Thaliana] (GB:O23515)
1621535_s_at	VIT_04s0023g03210	Ribosomal protein L8 (RPL8C) 60S	vv23010Ribosome	PU02516	gw1.57.264.1	At4g36130	Identical to 60S ribosomal protein L8-3 (RPL8C) [Arabidopsis Thaliana] (GB:Q42064
1609318_at	VIT_17s0000g09110	Ribosomal protein L27A (RPL27aC) 60S	vv23010Ribosome	PU24340	estExt_Genewise1_v1.C_LG_X5199	At1g70600	Identical to 60S ribosomal protein L27a-3 (RPL27AC) [Arabidopsis Thaliana] (GB:P49637
1618365_at	VIT_10s0003g03180_2	Ribosomal protein S14 (RPS14C) 40S	vv23010Ribosome	PU26443	eugene3.00091453	At3g52580	Identical to 40S ribosomal protein S14-3 (RPS14C) [Arabidopsis Thaliana] (GB:P42036
1610389_s_at	VIT_01s0011g01820	Ribosomal protein L27 (RPL27C) 60S	vv23010Ribosome	PU20527	estExt_Genewise1_v1.C_LG_I2658	At4g15000	Identical to 60S ribosomal protein L27-3 (RPL27C) [Arabidopsis Thaliana] (GB:P51419
1611286_s_at	VIT_09s0054g00030	Ribosomal protein L7 (RPL7D) 60S	vv23010Ribosome	PU04527	estExt_fgenesh4_pg.C_LG_X2159	At3g13580	Identical to 60S ribosomal protein L7-4 (RPL7D) [Arabidopsis Thaliana] (GB:Q9LHP1)
1613631_at	VIT_13s0064g00850	Ribosomal protein L30 (RPL30B) 60S	vv23010Ribosome	PU07453	grail3.0011019301	At1g77940	Identical to 60S ribosomal protein L30-2 (RPL30B) [Arabidopsis Thaliana] (GB:Q8VZ19
1607702_at	VIT_07s0151g00660	Ribosomal protein L24 (At5g23535) 50S	vv23010Ribosome	PU02321	estExt_fgenesh4_pm.C_LG_IV0116	At5g23535	similar to 50S ribosomal protein L24, chloroplast (CL24) [Arabidopsis thaliana] (TAIR:AT5G54600.1)
1620659_at	VIT_06s0080g00440	Ribosomal protein S9	vv23010Ribosome	PU23567	grail3.0079001501	At3g49080	similar to RPS9 (RIBOSOMAL PROTEIN S9), structural constituent of ribosome [Arabidopsis thaliana] (TAIR:AT1G74970.1)
1620354_at	VIT_14s0060g02050	Ribosomal protein L22-2 (RPL22B) 60S	vv23010Ribosome	PU09010	estExt_fgenesh4_pm.C_LG_X0057	At3g05560	Identical to 60S ribosomal protein L22-2 (RPL22B) [Arabidopsis Thaliana] (GB:Q9M9W1)
1615849_at	VIT_17s0119g00050	UBQ5 (ubiquitin 5)	vv23010Ribosome	PU09673	estExt_fgenesh4_pg.C_2320014	At2g47110	polyubiquitin gene
1622177_s_at	VIT_06s0004g07940	Ribosomal protein S26 (RPS26C) 40S	vv23010Ribosome	PU20221	estExt_Genewise1_v1.C_LG_XIII3119	At3g56340	Identical to 40S ribosomal protein S26-3 (RPS26C) [Arabidopsis Thaliana] (GB:Q9LYK9)
1609619_at	VIT_04s0008g05030	Ras GTP-binding protein (RAN3)	vv23008Ribosome_biogenesis_in_Eukaryotes vv23013RNA_transport vv50112Nuclear_pore_complex	PU21937	estExt_Genewise1_v1.C_LG_VI2910	At5g55190	A member of RAN GTPase gene family. Encodes a small soluble GTP-binding protein. Likely to be involved in nuclear translocation of proteins. May also be involved in cell cycle progression.
1621843_at	VIT_07s0031g03160	U3 small nucleolar ribonucleoprotein protein IMP4	vv23008Ribosome_biogenesis_in_Eukaryotes	PU22370	estExt_fgenesh4_pm.C_LG_XIV0226	At4g01560	similar to IMP4 [Arabidopsis thaliana] (TAIR:AT1G63780.1)
1612157_at	VIT_13s0067g01970	Laccase	vv11000Single_reactions vv50109Incompletely_characterized_transport_systems	PU06128	estExt_fgenesh4_pm.C_LG_VIII0291	At2g40370	putative laccase, a member of laccase family of genes (17 members in Arabidopsis).
1620469_at	VIT_10s0003g00470	Isoflavone methyltransferase/ Orcinol O-methyltransferase 1 oomt1	vv10943Isoflavonoid_biosynthesis	PU23268	fgenesh4_pg.C_LG_XIX000854	At4g35160	similar to O-methyltransferase family 2 protein [Arabidopsis thaliana] (TAIR:AT4G35150.1)
1610935_at	VIT_17s0000g03910	flavonoid 3-monooxygenase	vv10941Flavonoid_biosynthesis	PU01148	grail3.0057011701	At4g36220	encodes ferulate 5-hydroxylase (F5H). Involved in lignin biosynthesis.
*1611847_at	VIT_06s0009g02810	Flavonoid 3',5'-hydroxylase	vv10941Flavonoid_biosynthesis	PU12736	eugene3.00030242	At5g07990	Required for flavonoid 3' hydroxylase activity.
1615801_at	VIT_11s0052g01110	4-coumarate-CoA ligase 1	vv10940Phenylpropanoid_biosynthesis vv50104Group_translocators	PU01475	grail3.0100002702	At1g51680	encodes an isoform of 4-coumarate:CoA ligase (4CL), which is involved in the last step of the general phenylpropanoid pathway. In addition to 4-coumarate, it also converts ferulate. The catalytic efficiency was in the following (descending) order: p-coumaric acid, ferulic acid, caffeic acid and 5-OH-ferulic acid. At4CL1 was unable to use sinapic acid as substrate.
1609307_at	VIT_11s0052g01090	4-coumarate-CoA ligase 2	vv10940Phenylpropanoid_biosynthesis vv50104Group_translocators	PU01475	grail3.0100002702	At1g51680	encodes an isoform of 4-coumarate:CoA ligase (4CL), which is involved in the last step of the general phenylpropanoid pathway. In addition to 4-coumarate, it also converts ferulate. The catalytic efficiency was in the following (descending) order: p-coumaric acid, ferulic acid, caffeic acid and 5-OH-ferulic acid. At4CL1 was unable to use sinapic acid as substrate.
1617284_at	VIT_12s0059g01750	Caffeic acid O-methyltransferase	vv10940Phenylpropanoid_biosynthesis	PU23268	fgenesh4_pg.C_LG_XIX000854	At4g35160	similar to O-methyltransferase family 2 protein [Arabidopsis thaliana] (TAIR:AT4G35150.1)
1613542_at	VIT_18s0072g00920	Caffeate 3-O-methyltransferase 1	vv10940Phenylpropanoid_biosynthesis	PU07978	estExt_fgenesh4_pm.C_LG_XII0129	At5g54160	Identical to Quercetin 3-O-methyltransferase 1 (OMT1) [Arabidopsis Thaliana] (GB:Q9FK25
1619450_s_at	VIT_16s0098g00850	Caffeic acid O-methyltransferase	vv10940Phenylpropanoid_biosynthesis	PU07978	estExt_fgenesh4_pm.C_LG_XII0129	At5g54160	Identical to Quercetin 3-O-methyltransferase 1 (OMT1) [Arabidopsis Thaliana] (GB:Q9FK25
1614423_at	VIT_09s0070g00240	Cinnamoyl-CoA reductase	vv10940Phenylpropanoid_biosynthesis	PU01488	estExt_fgenesh4_kg.C_LG_III0056	At1g15950	similar to CCR2 (CINNAMOYL COA REDUCTASE) [Arabidopsis thaliana] (TAIR:AT1G80820.1)
1615439_at	VIT_03s0180g00260	Cinnamyl alcohol dehydrogenase	vv10940Phenylpropanoid_biosynthesis	PU00003	estExt_Genewise1_v1.C_LG_IX2359	At3g19450	Encodes a catalytically active cinnamyl alcohol dehydrogenase which uses p-coumaryl aldehyde as a preferred substrate. It can also use caffeyl, coniferyl and d-hydroxyconiferyl aldehydes as substrates.
1616575_at	VIT_16s0100g01140	Stilbene synthase 2	vv10940Phenylpropanoid_biosynthesis	PU12625	eugene3.00140920	At5g13930	Encodes chalcone synthase (CHS), a key enzyme involved in the biosynthesis of flavonoids. Required for the accumulation of purple anthocyanins in leaves and stems. Also involved in the regulation of auxin transport and the modulation of root gravitropism.
1611190_s_at	VIT_16s0100g01110	Resveratrol synthase (RS1)	vv10940Phenylpropanoid_biosynthesis	PU12625	eugene3.00140920	At5g13930	Encodes chalcone synthase (CHS), a key enzyme involved in the biosynthesis of flavonoids. Required for the accumulation of purple anthocyanins in leaves and stems. Also involved in the regulation of auxin transport and the modulation of root gravitropism.
1620964_s_at	VIT_16s0100g01200	Stilbene synthase	vv10940Phenylpropanoid_biosynthesis	PU12625	eugene3.00140920	At5g13930	Encodes chalcone synthase (CHS), a key enzyme involved in the biosynthesis of flavonoids. Required for the accumulation of purple anthocyanins in leaves and stems. Also involved in the regulation of auxin transport and the modulation of root gravitropism.
1613802_at	VIT_17s0000g00950	Hydroxycinnamoyl-CoA quinate hydroxycinnamoyltransferase	vv10940Phenylpropanoid_biosynthesis	PU09512	grail3.0005031901	At5g41040	similar to transferase family protein [Arabidopsis thaliana] (TAIR:AT5G63560.1)
1608306_at	VIT_17s0000g08460	Carbonic anhydrase, chloroplast precursor	vv10910Nitrogen_metabolism vv50124Porters_cat_30_to_64	PU26545	grail3.0005010201	At5g14740	Encodes a beta carbonic anhydrase likely to be localized in the cytoplasm. Expression of its mRNA is seen in etiolated seedlings and points to a possible nonphotosynthetic role for this isoform.
1622360_at	VIT_02s0033g00800	Nitrilase 4 (NIT4)	vv10910Nitrogen_metabolism	PU26157	fgenesh4_pg.C_scaffold_66000137	At5g22300	Identical to Nitrilase 4 (NIT4) [Arabidopsis Thaliana] (GB:P46011)
1621899_at	VIT_14s0030g01740	Zeta-carotene desaturase ZDS1	vv10906Carotenoid_biosynthesis	PU23597	fgenesh4_pg.C_LG_IV001501	At3g04870	Involved in the biosynthesis of carotenes and xanthophylls, reduces zeta-carotene to lycopene.
1622687_at	VIT_02s0025g02570	CYP78A8	vv10902Monoterpenoid_biosynthesis vv10940Phenylpropanoid_biosynthesis	PU01532	gw1.II.1429.1	At3g61880	Encodes a cytochrome p450 monooxygenase. Overexpression of this gene allows fruit growth independently of fertilization. The gene is normally expressed only in floral organs(during the Arabidopsis stage 14 flower) and in the funiculus at anthesis.
1609781_s_at	VIT_10s0116g01660	Lactoylglutathione lyase	vv10620Pyruvate_metabolism	PU08722	estExt_Genewise1_v1.C_LG_IV1582	At1g11840	Encodes a glyoxalase I homolog ATGLX1.
1607552_at	VIT_09s0002g02940	Myo-inositol oxygenase 1	vv10562Inositol_phosphate_metabolism	PU03161	gw1.VIII.2.1	At1g14520	Encodes MIOX1. Belongs to myo-inositol oxygenase gene family.
1613999_x_at	VIT_16s0050g02220	Acidic endochitinase (CHIB1)	vv10530Aminosugars_metabolism	PU10496	estExt_Genewise1_v1.C_1970084	At5g24090	Identical to Acidic endochitinase precursor (CHIB1) [Arabidopsis Thaliana] (GB:O22072
1607647_at	VIT_03s0038g03400	Endochitinase 1, basic	vv10530Aminosugars_metabolism	PU03804	estExt_Genewise1_v1.C_LG_IX0905	At3g12500	encodes a basic chitinase involved in ethylene/jasmonic acid mediated signalling pathway during systemic acquired resistance based on expression analyses.
1619612_at	VIT_07s0005g01300	Auxin-induced beta-glucosidase	vv10500Starch_and_sucrose_metabolism vv10902Monoterpenoid_biosynthesis vv40006Cell_wall	PU07418	fgenesh4_pm.C_LG_XIV000298	At1g02640	encodes a protein similar to a beta-xylosidase located in the extracellular matrix. This is a member of glycosyl hydrolase family 3 and has six other closely related members.
1607889_a_at	VIT_13s0019g00840	UDP-glucuronate decarboxylase.	vv10500Starch_and_sucrose_metabolism vv10520Nucleotide_sugars_metabolism	PU02592	estExt_Genewise1_v1.C_LG_I1353	At3g46440	encodes a protein similar to UDP-glucuronic acid decarboxylase. UDP-glucuronic acid decarboxylase produces UDP-xylose, which is a substrate for many cell wall carbohydrates including hemicellulose and pectin. UDP-xylose is also known to feedback regulate several cell wall biosynthetic enzymes.
1612748_at	VIT_07s0031g01540	4-alpha-glucanotransferase	vv10500Starch_and_sucrose_metabolism	PU25304	gw1.VII.2145.1	At5g64860	Encodes a maltotriose-metabolizing enzyme with chloroplastic a
1619757_at	VIT_18s0001g00060	1,4-alpha-glucan branching enzyme, chloroplast precursor	vv10500Starch_and_sucrose_metabolism	PU27717	fgenesh4_pg.C_LG_V001651	At2g36390	Encodes a starch branching enzyme (EC.2.4.1.18) similar to SBE2 from maize and rice. Expressed throughout plant tissues.
1619909_at	VIT_08s0007g05000	S-adenosylmethionine synthetase	vv10271Methionine_metabolism vv10450Selenoamino_acid_metabolism	PU01461	estExt_Genewise1_v1.C_280751	At2g36880	0
*1611875_at	VIT_02s0025g02560	O-succinylhomoserine sulfhydrylase	vv10271Methionine_metabolism vv10272Cysteine_metabolism vv10450Selenoamino_acid_metabolism vv10920Sulfur_metabolism	PU20211	estExt_Genewise1_v1.C_LG_I8346	At1g64660	Encodes a functional methionine gamma-lyase, a cytosolic enzyme catalyzes the degradation of methionine into methanethiol, alpha-ketobutyrate and ammonia. The catabolism of excess methionine is important to methionine homeostasis.
1617899_at	VIT_01s0011g01990	Glycine decarboxylase	vv10260Glycine_serine_and_threonine_metabolism	PU22552	estExt_fgenesh4_pg.C_LG_XII1299	At2g35120	similar to glycine cleavage system H protein, mitochondrial, putative [Arabidopsis thaliana] (TAIR:AT1G32470.1)
1620208_at	VIT_17s0000g05060	Phytochelatin synthetase	vv10251Glutamate_metabolism	PU08895	estExt_Genewise1_v1.C_1290161	At5g15630	Identical to COBRA-like protein 4 precursor (COBL4) [Arabidopsis Thaliana] (GB:Q9LFW3
1610020_at	VIT_06s0080g00560	Beta-alanine synthase	vv10220Urea_cycle_and_metabolism_of_amino_groups	PU27069	eugene3.00660157	At2g27450	Encodes N-carbamoylputrescine amidohydrolase that is involved in putrescine and polyamine biosynthesis.
1607960_at	VIT_18s0001g06580	Plastocyanin domain-containing protein	vv10195Photosynthesis vv50113Thylakoid_targeting_pathway	PU07720	estExt_fgenesh4_pg.C_LG_II0928	At1g22480	similar to plastocyanin-like domain-containing protein [Arabidopsis thaliana] (TAIR:AT1G72230.1)
1615852_a_at	VIT_13s0067g03810	Cytochrome c oxidase subunit 6b (COX6b)	vv10190Oxidative_phosphorylation vv50135Primary_active_transporter_cat_D3_to_E2	PU07566	eugene3.00050682	At1g22450	subunit 6b of cytochrome c oxidase
1613635_at	VIT_16s0039g01410	Tocopherol O-methyltransferase, chloroplast precursor	vv10100Biosynthesis_of_steroids	PU11924	fgenesh4_pm.C_LG_XIII000331	At1g64970	mutant has Deficient in alpha and beta tocopherol
1608527_at	VIT_16s0100g00300	Sorbitol dehydrogenase	vv10051Fructose_and_mannose_metabolism	PU03589	estExt_fgenesh4_pg.C_LG_XII1187	At5g51970	similar to oxidoreductase, zinc-binding dehydrogenase family protein [Arabidopsis thaliana] (TAIR:AT5G63620.1)
1619426_s_at	VIT_04s0043g00720	Transketolase	vv10030Pentose_phosphate vv10710Carbon_fixation	PU01987	grail3.0080008401	At2g34590	similar to PDH-E1 BETA (PYRUVATE DEHYDROGENASE E1 BETA), pyruvate dehydrogenase (acetyl-transferring) [Arabidopsis thaliana] (TAIR:AT1G30120.1)
1617677_at	VIT_00s0373g00040	Malate dehydrogenase Glyoxysomal	vv10020Citrate_cycle vv10620Pyruvate_metabolism vv10630Glyoxylate_and_dicarboxylate_metabolism vv10710Carbon_fixation vv10720Reductive_carboxylate_cycle	PU08271	grail3.0001073802	At5g09660	encodes a microbody NAD-dependent malate dehydrogenase encodes an peroxisomal NAD-malate dehydrogenase that is involved in fatty acid beta-oxidation through providing NAD to the process of converting fatty acyl CoA to acetyl CoA.
1616500_at	VIT_18s0001g15450	Alcohol dehydrogenase 3	vv10010Glycolysis vv10071Fatty_acid_metabolism vv10350Tyrosine_metabolism	PU04010	fgenesh4_pg.C_scaffold_70000003	At1g77120	Identical to Alcohol dehydrogenase class-P (ADH1) [Arabidopsis Thaliana] (GB:Q9CAZ2
1614086_at	VIT_18s0001g15410	Alcohol dehydrogenase 1	vv10010Glycolysis vv10071Fatty_acid_metabolism vv10350Tyrosine_metabolism	PU04010	fgenesh4_pg.C_scaffold_70000003	At1g77120	Identical to Alcohol dehydrogenase class-P (ADH1) [Arabidopsis Thaliana] (GB:Q9CAZ2
1616039_at	VIT_06s0004g04800	Triosephosphate isomerase, cytosolic	vv10010Glycolysis vv10051Fructose_and_mannose_metabolism vv10710Carbon_fixation	PU02496	grail3.0049021504	At3g55440	Encodes a cytosolic protein with triosephosphate isomerase activity.
1621885_at	VIT_06s0004g06210	CYP86A1	0	PU21036	fgenesh4_pm.C_LG_I000645	At5g58860	Encodes a member of the CYP86A subfamily of cytochrome p450 genes. Expressed significantly only in root tissue.
1609429_at	VIT_16s0100g00270	Peptidoglycan-binding LysM domain-containing protein	0	PU26902	fgenesh4_pg.C_LG_II001403	At5g62150	similar to peptidoglycan-binding LysM domain-containing protein [Arabidopsis thaliana] (TAIR:AT4G25433.1)
1617348_at	VIT_16s0022g01800	RRNA-processing protein EBP2	0	PU03772	estExt_fgenesh4_pg.C_LG_II1111	At3g22660	Identical to Probable rRNA-processing protein EBP2 homolog [Arabidopsis Thaliana] (GB:Q9LUJ5)
1607963_at	VIT_17s0000g04320	Partner of Nob1	0	PU01033	fgenesh4_pm.C_scaffold_140000021	At3g13230	similar to unnamed protein product [Vitis vinifera] (GB:CAO67996.1)
1609116_at	VIT_14s0108g00410	Retrovirus Pol polyprotein	0	PU11029	estExt_fgenesh4_pg.C_LG_XVII0358	At1g14340	similar to nucleic acid binding [Arabidopsis thaliana] (TAIR:AT3G01210.1)
1620985_at	VIT_16s0098g01060	Heat shock protein 26a, chloroplast	0	PU21650	gw1.XII.533.1	At4g27670	Identical to Small heat shock protein, chloroplast precursor (HSP21) [Arabidopsis Thaliana] (GB:P31170)
1609305_at	VIT_00s0250g00020	Protein tyrosine phosphatase	0	PU04006	gw1.X.2954.1	At3g52180	Encodes a plant-specific protein phosphatase that contains a protein tyrosine phosphatase (PTP) catalytic domain and a kinase interaction sequence (KIS) domain. This protein interacts with the plant SnRK AKIN11. Binds starch. Localized in the chloroplast.
1619852_s_at	VIT_05s0029g00240	Pentatricopeptide (PPR) repeat-containing	0	PU05684	estExt_fgenesh4_pm.C_880011	At4g14030	Identical to Putative selenium-binding protein [Arabidopsis Thaliana] (GB:O23264)
1608677_at	VIT_03s0063g00850	RNA-binding protein 47B (ATRBP47B)	0	PU00250	fgenesh4_pg.C_LG_IX000590	At3g19130	0
1620588_at	VIT_14s0171g00100	Blue (type 1) copper domain	0	PU00311	gw1.I.3002.1	At3g27200	similar to plastocyanin-like domain-containing protein [Arabidopsis thaliana] (TAIR:AT5G07475.1)
1616748_at	VIT_16s0098g00830	Nascent polypeptide associated complex alpha chain	0	PU09216	eugene3.00150038	At3g49470	Identical to Nascent polypeptide-associated complex subunit alpha-like protein 2 [Arabidopsis Thaliana] (GB:Q94JX9
1615959_at	VIT_18s0001g03880	Polcalcin	0	PU05191	eugene3.00020820	At1g24620	similar to calcium-binding protein, putative [Arabidopsis thaliana] (TAIR:AT1G18210.1)
1618825_at	VIT_05s0094g00530	Calmodulin binding protein	0	PU07784	eugene3.01420057	At3g59690	0
1610830_at	VIT_02s0025g03780	Remorin	0	PU27960	estExt_fgenesh4_pm.C_LG_XV0452	At5g23750	similar to remorin family protein [Arabidopsis thaliana] (TAIR:AT3G48940.1)
1622090_at	VIT_17s0000g08670	Glutaredoxin	0	PU03071	estExt_fgenesh4_pg.C_LG_XV0532	At5g63030	Identical to Glutaredoxin-C1 (GRXC1) [Arabidopsis Thaliana] (GB:Q8L8T2
1608715_at	VIT_09s0002g06070	Late embryogenesis abundant protein	0	PU23570	eugene3.00011051	At1g52690	similar to late embryogenesis abundant protein, putative / LEA protein, putative [Arabidopsis thaliana] (TAIR:AT3G15670.1)
1619802_at	VIT_11s0016g03950	Dehydration-responsive protein (RD22)	0	PU23874	estExt_Genewise1_v1.C_LG_XIX0239	At5g25610	Identical to Dehydration-responsive protein RD22 precursor (RD22) [Arabidopsis Thaliana] (GB:Q08298)
1620890_at	VIT_13s0067g01250	Em protein GEA6 (EM6)	0	PU23559	grail3.0022012001	At2g40170	Identical to Em-like protein GEA6 (EM6) [Arabidopsis Thaliana] (GB:Q02973)
1621901_at	VIT_06s0004g00980	Dirigent protein pDIR9	0	PU26104	fgenesh4_pg.C_scaffold_3758000001	At1g58170	similar to disease resistance-responsive protein-related / dirigent protein-related [Arabidopsis thaliana] (TAIR:AT5G49040.1)
1619091_at	VIT_17s0000g04520	Cell growth defect factor 1	0	PU20237	gw1.XII.99.1	At5g23040	Cell growth defect factor 1.Causes Bax mediated lethality in yeast by generating reactive oxygen species and this effect is suppressed by AtBI-1.
1618515_s_at	VIT_14s0060g02270	Translationally-controlled tumor protein	0	PU00796	estExt_Genewise1_v1.C_LG_X3955	At3g16640	Identical to Translationally-controlled tumor protein homolog (TCTP) [Arabidopsis Thaliana] (GB:P31265
1622407_at	VIT_08s0007g04000	Unknown protein	0	PU25271	grail3.0015035301	At3g10020	similar to Os12g0147200 [Oryza sativa (japonica cultivar-group)] (GB:NP_001066153.1)
1615720_s_at	VIT_08s0105g00270	NC domain-containing protein	0	PU26460	estExt_fgenesh4_pm.C_LG_VI0448	At5g06370	similar to NC domain-containing protein [Arabidopsis thaliana] (TAIR:AT3G02700.1)
1611931_at	VIT_17s0000g00070	Unknown protein	0	PU23547	estExt_fgenesh4_pg.C_LG_XV0825	At5g07330	similar to unknown protein [Arabidopsis thaliana] (TAIR:AT1G63060.1)
1613056_at	VIT_12s0035g01340	Unknown protein	0	PU02875	gw1.86.114.1	At1g09610	similar to unknown protein [Arabidopsis thaliana] (TAIR:AT4G09990.1)
1610224_at	VIT_13s0067g01180	Leaf senescence related	0	PU07489	estExt_fgenesh4_pg.C_LG_X1673	At3g55990	similar to unknown protein [Arabidopsis thaliana] (TAIR:AT2G40150.1)
1610045_at	VIT_00s0214g00090	F-box protein PP2-B10 (Protein phloem protein 2-like B10)	0	PU03100	gw1.VI.283.1	At2g02240	Identical to F-box protein At2g02240 [Arabidopsis Thaliana] (GB:Q3E6P4)
1618148_at	VIT_11s0016g05430	Unknown protein	0	PU12284	estExt_fgenesh4_pg.C_LG_VI0496	At5g20190	similar to binding [Arabidopsis thaliana] (TAIR:AT1G80130.1)
1621110_at	VIT_11s0016g03980	Unknown protein	0	PU23528	estExt_fgenesh4_pg.C_LG_XVIII0658	At2g17240	similar to unknown protein [Arabidopsis thaliana] (TAIR:AT3G24506.1)
1610015_at	VIT_03s0063g02630	Unknown protein	0	PU03150	grail3.0003048501	At4g39235	similar to unknown protein [Arabidopsis thaliana] (TAIR:AT3G05570.1)
1607725_at	VIT_18s0001g15330	Nodulin MtN3 family	0	PU26291	gw1.V.158.1	At1g21460	similar to nodulin MtN3 family protein [Arabidopsis thaliana] (TAIR:AT4G10850.1)
1611724_at	VIT_12s0028g03760	UPF0497 family	0	PU27559	grail3.0120003901	At4g03540	Identical to UPF0497 membrane protein At4g03540 [Arabidopsis Thaliana] (GB:Q9ZT81)
1620603_at	VIT_05s0020g04440	Unknown protein	0	PU06034	gw1.VIII.515.1	At3g55760	similar to unknown protein [Arabidopsis thaliana] (TAIR:AT1G42430.1)
1616874_at	VIT_06s0004g08380	Unknown protein	0	PU26376	estExt_Genewise1_v1.C_LG_XIII0363	At5g58250	similar to hypothetical protein [Vitis vinifera] (GB:CAN75840.1)
1608878_s_at	VIT_08s0058g00870	Unknown protein	0	PU23225	eugene3.00161267	At5g01750	Identical to Uncharacterized protein At5g01750 [Arabidopsis Thaliana] (GB:Q9LZX1
1607124_at	VIT_05s0094g01540	Unknown protein	0	PU08217	gw1.VII.308.1	At3g59910	similar to unknown protein [Arabidopsis thaliana] (TAIR:AT2G44090.1)
1608947_at	VIT_08s0040g00490	Caspase	0	PU26648	grail3.0101007801	At5g04200	0
1621671_at	VIT_06s0004g02950	Helicase conserved C-terminal domain containing protein	0	PU11821	grail3.0028016001	At3g53400	similar to CPuORF47 (Conserved peptide upstream open reading frame 47) [Arabidopsis thaliana] (TAIR:AT5G03190.1)
1616296_at	VIT_05s0094g00760	Unknown protein	0	PU06052	gw1.2638.2.1	At2g43780	similar to hypothetical protein OsI_037823 [Oryza sativa (indica cultivar-group)] (GB:EAY83864.1)
1608853_at	VIT_09s0002g06980	Chloroplast post-illumination chlorophyll fluorescence increase protein	0	PU09120	estExt_Genewise1_v1.C_LG_I0106	At3g15840	similar to chloroplast post-illumination chlorophyll fluorescence increase protein [Nicotiana tabacum] (GB:ABI51594.1)
1612135_at	VIT_06s0004g05950	Unknown protein	0	PU05416	grail3.0054013701	At5g58960	similar to unknown protein [Arabidopsis thaliana] (TAIR:AT2G45260.1)
1617762_at	VIT_14s0030g01460	Unknown protein	0	PU02392	eugene3.00700115	At5g27990	similar to unknown protein [Arabidopsis thaliana] (TAIR:AT3G22510.1)
1610888_at	VIT_18s0001g13890	Unknown protein	0	PU12952	estExt_fgenesh4_pg.C_860078	At5g39600	similar to unknown [Populus trichocarpa] (GB:ABK93996.1)
*1621633_s_at	VIT_17s0000g08830	SOUL heme-binding	0	PU03610	grail3.0005014101	At1g17100	similar to SOUL heme-binding family protein [Arabidopsis thaliana] (TAIR:AT1G78450.1)
*1607861_s_at	VIT_06s0004g00200	Splicing factor YT521-B	0	PU07411	estExt_fgenesh4_pm.C_LG_III0726	At3g13460	Physically interacts with CIPK1.
*1611219_s_at	VIT_10s0116g01210	Aspartyl protease	0	PU25142	estExt_fgenesh4_pm.C_LG_II0998	At1g11910	similar to aspartyl protease family protein [Arabidopsis thaliana] (TAIR:AT4G04460.1)
1619034_at	VIT_15s0048g01950	CYP87A3		PU21751	LG_V: 489214-489381	At1g12740	encodes a protein with cytochrome P450 domain
1612984_at	VIT_13s0106g00780	Hydrolase, alpha/beta fold		PU03593	eugene3.00080179	At2g36290	similar to esterase/lipase/thioesterase family protein [Arabidopsis thaliana] (TAIR:AT1G74300.1)
1611159_at	VIT_07s0151g00430	Kinase interacting family protein	vv60087Orphans_KIP1_SANTA	PU06351	eugene3.00031337	At1g03080	similar to kinase interacting family protein [Arabidopsis thaliana] (TAIR:AT3G22790.1)
1621456_at	VIT_01s0011g04080	Zinc finger (C3HC4-type ring finger)	vv60078Other_zf-C3HC4	PU07836	eugene3.00120446	At1g17970	similar to zinc finger (C3HC4-type RING finger) family protein [Arabidopsis thaliana] (TAIR:AT1G73760.1)
1611183_at	VIT_13s0019g03280	LIM domain containing protein	vv60040LIM	PU06253	estExt_fgenesh4_pm.C_LG_VIII0239	At3g55770	similar to LIM domain-containing protein [Arabidopsis thaliana] (TAIR:AT2G39900.1)
1612070_at	VIT_10s0071g00870	High mobility group B 6	vv60035HMG	PU24480	estExt_fgenesh4_pg.C_LG_VII1313	At5g23420	Encodes a protein belonging to the subgroup of HMGB (high mobility group B) proteins
1619410_at	VIT_01s0026g01550	Homeodomain leucine zipper protein HB-1	vv60034HB	PU06601	fgenesh4_pm.C_LG_XV000148	At3g01470	Encodes a homeodomain leucine zipper class I (HD-Zip I) transcriptional activator involved in leaf development.
1622296_at	VIT_18s0001g13040	Basic leucine-zipper 11 GBF6	vv60012BZIP	PU26858	estExt_Genewise1_v1.C_LG_II0889	At1g75390	0
1617754_at	VIT_00s1312g00010	Basic helix-loop-helix (bHLH) family	vv60011BHLH	PU03938	estExt_fgenesh4_pg.C_LG_II0987	At5g65640	0
1616137_at	VIT_08s0058g00960	Basic helix-loop-helix (bHLH) family	vv60011BHLH	PU05584	fgenesh4_pg.C_LG_XIII000512	At2g40435	similar to transcription regulator [Arabidopsis thaliana] (TAIR:AT3G56220.1)
1607605_at	VIT_08s0056g01150	NADH-cytochrome b5 reductase	vv50135Primary_active_transporter_cat_D3_to_E2	PU02062	eugene3.00130653	At5g17770	similar to NADH-cytochrome b5 reductase, putative [Arabidopsis thaliana] (TAIR:AT5G20080.1)
1607237_at	VIT_06s0004g04720	Import inner membrane translocase subunit Tim9, Mitochondrial	vv50132Primary_active_transporter_cat_A5_to_A8	PU20247	estExt_Genewise1_v1.C_LG_XII1623	At3g46560	Encodes a small zinc finger-like protein that is a component of the mitochondrial protein import apparatus.
1611777_at	VIT_17s0000g00780	Import inner membrane translocase subunit Tim8, Mitochondrial	vv50132Primary_active_transporter_cat_A5_to_A8	PU25109	eugene3.00150807	At5g50810	Encodes a small zinc finger-like protein that is a component of the mitochondrial protein import apparatus.
1610666_at	VIT_07s0130g00400	Chloride channel protein (CLC-c)	vv50124Porters_cat_30_to_64	PU23564	fgenesh4_pm.C_scaffold_86000024	At5g49890	member of Anion channel protein family
1608940_at	VIT_13s0019g03220	Proline transporter 1 (ProT1)	vv50123Porters_cat_18_to_29	PU23595	fgenesh4_pm.C_LG_VIII000238	At2g39890	Encodes a proline transporter with affinity for gly betaine, proline and GABA. Protein is expressed in the vascular tissue, specifically the phloem.
1611892_s_at	VIT_13s0019g03220	Proline transporter 1 (ProT1)	vv50123Porters_cat_18_to_29	PU23595	fgenesh4_pm.C_LG_VIII000238	At2g39890	Encodes a proline transporter with affinity for gly betaine, proline and GABA. Protein is expressed in the vascular tissue, specifically the phloem.
1619989_s_at	VIT_06s0004g01910	ADP,ATP carrier protein	vv50123Porters_cat_18_to_29	PU04151	estExt_fgenesh4_pg.C_LG_I1918	At3g08580	mitochondrial ADP/ATP carrier
1617645_s_at	VIT_10s0003g00300	Acclimation of photosynthesis to environment	vv50122Porters_cat_7_to_17	PU20022	estExt_Genewise1_v1.C_1240222	At5g46110	mutant has Altered acclimation responses
1622591_at	VIT_16s0022g00680	Multi-copper oxidase (SKU5)	vv50109Incompletely_characterized_transport_systems	PU07472	estExt_fgenesh4_pg.C_1270047	At4g12420	encodes a protein of unknown function involved in directed root tip growth. It is a member of 19-member gene family and is distantly related structurally to the multiple-copper oxidases ascorbate oxidase and laccase, though it lacks the copper-binding domains. The protein is glycosylated and GPI-anchored. It is localized to the plasma membrane and the cell wall. The gene is expressed most strongl…
1613528_at	VIT_00s0253g00040	Monocopper oxidase SKS17 (SKU5 Similar 17)	vv50109Incompletely_characterized_transport_systems	PU01821	estExt_Genewise1_v1.C_LG_VII3096	At5g66920	0
1622108_at	VIT_02s0154g00080	Multi-copper oxidase (SKU5)	vv50109Incompletely_characterized_transport_systems	PU07472	estExt_fgenesh4_pg.C_1270047	At4g12420	encodes a protein of unknown function involved in directed root tip growth. It is a member of 19-member gene family and is distantly related structurally to the multiple-copper oxidases ascorbate oxidase and laccase, though it lacks the copper-binding domains. The protein is glycosylated and GPI-anchored. It is localized to the plasma membrane and the cell wall. The gene is expressed most strongl…
1607836_at	VIT_12s0028g00530	Cytochrome B561	vv50105Transport_electron_carriers	PU01613	eugene3.00051111	At2g30890	similar to cytochrome B561-related [Arabidopsis thaliana] (TAIR:AT4G18260.1)
1619703_at	VIT_13s0067g00220	Aquaporin TMP-C	vv50101Channels_and_pores	PU03612	estExt_fgenesh4_pm.C_LG_VI0336	At4g00430	water channel
1610982_at	VIT_06s0004g02850	Aquaporin PIP2B	vv50101Channels_and_pores	PU07549	estExt_fgenesh4_pg.C_280159	At2g37170	water channel
1609934_at	VIT_06s0004g04120	Aquaporin TIP1;3	vv50101Channels_and_pores	PU20179	estExt_fgenesh4_pg.C_LG_X1886	At4g01470	3)
1607943_at	VIT_06s0061g00730	Aquaporin GAMMA-TIP3/TIP1;3	vv50101Channels_and_pores	PU20179	estExt_fgenesh4_pg.C_LG_X1886	At4g01470	3)
1614387_s_at	VIT_06s0004g04120	Aquaporin TIP1;3	vv50101Channels_and_pores	PU20179	estExt_fgenesh4_pg.C_LG_X1886	At4g01470	3)
1622607_at	VIT_06s0004g04120	Aquaporin TIP1;3	vv50101Channels_and_pores	PU20179	estExt_fgenesh4_pg.C_LG_X1886	At4g01470	3)
1621946_at	VIT_17s0000g02420	Auxin transport protein (PIN3)	vv50004Auxin_transport vv50125Porters_cat_66_to_94	PU02471	estExt_Genewise1_v1.C_LG_XII1068	At1g73590	Encodes a putative auxin efflux carrier involved in shoot and root development. It is involved in the maintenance of embryonic auxin gradients. Loss of function severely affects organ initiation, pin1 mutants are characterised by an inflorescence meristem that does not initiate any flowers, resulting in the formation of a naked inflorescence stem. PIN1 is involved in the determination of leaf sha…
1614689_at	VIT_08s0007g03090	Kinesin family member 11	vv44810Regulation_of_actin_cytoskeleton	PU05489	estExt_fgenesh4_pm.C_LG_VI0588	At2g36200	Identical to Probable 125 kDa kinesin-related protein [Arabidopsis Thaliana] (GB:P82266)
1608494_at	VIT_10s0003g03500	Katanin p60 catalytic subunit	vv44810Regulation_of_actin_cytoskeleton	PU07788	gw1.IV.2502.1	At2g34560	similar to ERH3 (ECTOPIC ROOT HAIR 3), ATP binding / nucleoside-triphosphatase/ nucleotide binding [Arabidopsis thaliana] (TAIR:AT1G80350.1)
1619210_at	VIT_06s0061g00750	Superoxide dismutase [Cu-Zn], chloroplast precursor	vv44146Peroxisome	PU12701	fgenesh4_pm.C_scaffold_163000009	At2g28190	Encodes a chloroplastic copper/zinc superoxide dismutase CSD2 that can detoxify superoxide radicals. Its expression is affected by miR398-directed mRNA cleavage.
1618504_at	VIT_15s0046g02560	GLABRA 3	vv44110Cell_cycle vv60011BHLH	PU06496	estExt_Genewise1_v1.C_LG_XIV1259	At5g41315	encodes a basic helix loop helix domain protein that interacts with GL1 in trichome development.
1619665_at	VIT_03s0038g02800	Cyclin B2;4	vv44110Cell_cycle	PU08738	eugene3.03180006	At1g76310	4)
1617030_at	VIT_04s0008g00530	Serine/threonine-protein kinase Aurora-1	vv44110Cell_cycle	PU01275	estExt_fgenesh4_pg.C_LG_VI1609	At4g32830	Encodes a member of a family of Ser/Thr kinases whose activities peak during cell division. Transcripts are abundant in tissues rich in dividing cells like roots and flowers but are low or absent in fully expanded leaves and stems. In interphase cells, the protein is predominantly nuclear. During mitosis, the protein associates with plant-specific cytoskeletal structures (preprophase band, phragm…
1616522_at	VIT_11s0016g00290	Pectinesterase PME3	vv40006Cell_wall	PU04129	eugene3.00061882	At3g14310	similar to ATPME2 (Arabidopsis thaliana pectin methylesterase 2) [Arabidopsis thaliana] (TAIR:AT1G53830.1)
1608945_at	VIT_05s0062g00610	Xyloglucan endotransglucosylase/hydrolase 23	vv40006Cell_wall	PU12944	eugene3.00140931	At3g23730	Identical to Probable xyloglucan endotransglucosylase/hydrolase protein 16 precursor (XTH16) [Arabidopsis Thaliana] (GB:Q8LG58
1614426_at	VIT_05s0062g00250	Xyloglucan endotransglucosylase/hydrolase 15	vv40006Cell_wall	PU12944	eugene3.00140931	At3g23730	Identical to Probable xyloglucan endotransglucosylase/hydrolase protein 16 precursor (XTH16) [Arabidopsis Thaliana] (GB:Q8LG58
1609790_at	VIT_10s0003g02440	Xyloglucan endotransglucosylase/hydrolase 23	vv40006Cell_wall	PU12944	eugene3.00140931	At3g23730	Identical to Probable xyloglucan endotransglucosylase/hydrolase protein 16 precursor (XTH16) [Arabidopsis Thaliana] (GB:Q8LG58
1619762_at	VIT_08s0040g01970	fasciclin arabinogalactan-protein (FLA11)	vv40006Cell_wall	PU07606	eugene3.00160813	At5g03170	Identical to Fasciclin-like arabinogalactan protein 11 precursor (FLA11) [Arabidopsis Thaliana] (GB:Q8LEJ6
1612462_at	VIT_07s0129g00580	Snakin-1	vv30010Gibberellin_signaling	PU23502	eugene3.00012410	At2g14900	similar to gibberellin-regulated family protein [Arabidopsis thaliana] (TAIR:AT5G59845.1)
1607897_at	VIT_08s0007g05860	GASA like	vv30010Gibberellin_signaling	PU26431	gw1.I.801.1	At1g74670	similar to GASA4 (GAST1 PROTEIN HOMOLOG 4) [Arabidopsis thaliana] (TAIR:AT5G15230.1)
1621827_at	GSVIVT00002779001	Flowering locus C-like MADS-box protein	vv30009Flower_development vv60042MADS	PU25655	grail3.0047013701	At5g10140	MADS-box protein encoded by FLOWERING LOCUS C - transcription factor that functions as a repressor of floral transition and contributes to temperature compensation of the circadian clock. Expression is downregulated during cold treatment. Vernalization, FRI and the autonomous pathway all influence the state of FLC chromatin. Histone H3 trimethylation at lysine 4 and histone acetylation are associ…
1621228_at	VIT_11s0016g04630	GAI protein.	vv30009Flower_development vv30010Gibberellin_signaling vv60032GRAS	PU03640	fgenesh4_pm.C_LG_VIII000571	At1g14920	Similar to a putative transcription factor and transcriptional coactivators. Repressor of GA responses and involved in gibberellic acid mediated signaling. Member of the DELLA proteins that restrain the cell proliferation and expansion that drives plant growth. The protein undergoes degradation in response to GA via 26S proteasome.
1608299_at	VIT_11s0016g02170	FVE gene	vv30009Flower_development	PU06658	eugene3.02850001	At2g19520	Identical to WD-40 repeat-containing protein MSI4 (MSI4) [Arabidopsis Thaliana] (GB:O22607
1618286_at	VIT_09s0002g00470	Ethylene response factor	vv30008Ethylene_signaling vv60003AP2_EREBP	PU02532	estExt_Genewise1_v1.C_LG_III1021	At1g53910	encodes a member of the ERF (ethylene response factor) subfamily B-2 of ERF/AP2 transcription factor family (RAP2.12). The protein contains one AP2 domain. There are 5 members in this subfamily including RAP2.2 AND RAP2.12.
1613776_at	VIT_18s0001g13930	Auxin response factor 5 (Transcription factor MONOPTEROS)	vv30003Auxin_signaling vv60004ARF	PU13327	grail3.0002064402	At1g19850	Encodes a transcription factor (IAA24) mediating embryo axis formation and vascular development. Similar to AUXIN RESPONSIVE FACTOR 1 (ARF1) shown to bind to auxin responsive elements (AREs), and to the maize transcriptional activator VIVIPAROUS 1( VP1). In situ hybridization shows expression in provascular tissue of embryos, the emerging shoot primordia, then is restricted to provascular tissue,…
1608191_at	VIT_08s0007g00440	Alpha-expansin 6 precursor	vv30003Auxin_signaling	PU07379	grail3.0023018201	At2g28950	Identical to Expansin-A6 precursor (EXPA6) [Arabidopsis Thaliana] (GB:Q38865
1618142_at	VIT_03s0038g01820	Translocon-associated protein alpha TRAP complex	vv24141Protein_processing_in_endoplasmic_reticulum vv50133Primary_active_transporter_cat_A9_to_A18	PU02310	estExt_fgenesh4_pg.C_LG_IX0369	At2g21160	Identical to Translocon-associated protein subunit alpha precursor [Arabidopsis Thaliana] (GB:P45434
1609518_at	VIT_16s0050g02410	Ubiquitin-conjugating enzyme E2 D/E	vv24120Ubiquitin_mediated_proteolysis vv24141Protein_processing_in_endoplasmic_reticulum	PU28094	estExt_Genewise1_v1.C_LG_I8663	At1g64230	0
1616399_s_at	VIT_09s0002g02100	DEAD box RNA helicase (RH20)	vv23040Spliceosome vv50133Primary_active_transporter_cat_A9_to_A18	PU09378	estExt_fgenesh4_pg.C_440087	At1g55150	Identical to DEAD-box ATP-dependent RNA helicase 20 (RH20) [Arabidopsis Thaliana] (GB:Q9C718
1619528_s_at	VIT_16s0098g01580	Heat shock protein 70	vv23040Spliceosome vv24141Protein_processing_in_endoplasmic_reticulum vv50101Channels_and_pores	PU05792	estExt_Genewise1_v1.C_LG_III0234	At5g28540	0
1619744_at	VIT_17s0000g02860	G1 to S phase transition protein	vv23015mRNA_surveillance_pathway	PU03396	estExt_fgenesh4_pg.C_LG_XIII0436	At1g18070	similar to elongation factor 1-alpha / EF-1-alpha [Arabidopsis thaliana] (TAIR:AT5G60390.1)
1621460_at	VIT_11s0016g00450	Translation initiation factor 3 subunit K	vv23013RNA_transport	PU01003	gw1.XVIII.595.1	At4g33250	Identical to Eukaryotic translation initiation factor 3 subunit K (TIF3K1) [Arabidopsis Thaliana] (GB:Q9SZA3)
1619943_at	VIT_18s0001g06290	Ribosomal protein S6 (RPS6B) 40S	vv23010Ribosome vv34150mTOR_signaling_pathway	PU01989	estExt_fgenesh4_pg.C_LG_I2492	At5g10360	0
1612990_at	VIT_08s0040g01870	Ribosomal protein L12 (RPL12C) 60S	vv23010Ribosome vv30001ABA_signaling	PU04952	eugene3.01640075	At5g60670	Identical to 60S ribosomal protein L12-3 (RPL12C) [Arabidopsis Thaliana] (GB:Q9FF52)
1608096_at	VIT_14s0108g00460	Ribosomal protein S9 (RPS9C) 40S	vv23010Ribosome	PU09563	estExt_Genewise1_v1.C_LG_XVI2405	At5g39850	Identical to 40S ribosomal protein S9-2 (RPS9C) [Arabidopsis Thaliana] (GB:Q9FLF0)
1613237_at	VIT_05s0020g02990	Ribosomal protein S16 (RPS16C) 40S	vv23010Ribosome	PU01922	estExt_fgenesh4_pg.C_LG_X0832	At2g09990	Identical to 40S ribosomal protein S16-1 (RPS16A) [Arabidopsis Thaliana] (GB:Q9SK22)
1614145_at	VIT_14s0060g02310	Ribosomal protein L22-2 (RPL22B) 60S	vv23010Ribosome	PU09010	estExt_fgenesh4_pm.C_LG_X0057	At3g05560	Identical to 60S ribosomal protein L22-2 (RPL22B) [Arabidopsis Thaliana] (GB:Q9M9W1)
1616219_at	VIT_07s0151g00900	Ribosomal protein S24 (RPS24A) 40S	vv23010Ribosome	PU00966	gw1.X.5890.1	At3g04920	Identical to 40S ribosomal protein S24-1 (RPS24A) [Arabidopsis Thaliana] (GB:Q9SS17)
1615470_at	VIT_12s0059g02250	Ribosomal protein L6	vv23010Ribosome	PU11636	eugene3.00141000	At1g05190	0
1609170_at	VIT_13s0067g01820	Ribosomal protein S4 (RPS4D) 40S	vv23010Ribosome	PU04184	estExt_fgenesh4_pm.C_LG_VI0361	At5g58420	Identical to 40S ribosomal protein S4-3 (RPS4D) [Arabidopsis Thaliana] (GB:Q8VYK6
1619526_at	VIT_08s0105g00430	Omega-3 fatty acid desaturase, chloroplast precursor	vv11040Biosynthesis_of_unsaturated_fatty_acids	PU09018	estExt_fgenesh4_pm.C_LG_VI0352	At5g05580	Encodes a temperature sensitive plastidic fatty acid desaturase.
1614038_at	VIT_13s0019g01260	Enoyl reductase	vv11040Biosynthesis_of_unsaturated_fatty_acids	PU24459	estExt_Genewise1_v1.C_LG_VIII1722	At3g55360	Enoyl-CoA reductase is involved in all very long chain fatty acids (VLCFA) elongation reactions that are required for cuticular wax, storage lipid and sphingolipid metabolism. The protein is located in the ER, but in contrast to its yeast homolog TSC13 is not particularly enriched in the nuclear envelope-vacuole junction. Mutants in this gene show abnormal organ morphology and stem glossiness. Ce…
1620679_at	VIT_17s0000g02680	ABA glucosidase	vv11013ABA_biosynthesis	PU00447	gw1.XII.1817.1	At3g18080	similar to glycosyl hydrolase family 1 protein [Arabidopsis thaliana] (TAIR:AT3G18070.1)
1610247_a_at	VIT_01s0127g00800	Polyamine oxidase precursor	vv11000Single_reactions	PU04312	grail3.0005009402	At5g13700	Encodes a protein with polyamine oxidase activity. The mRNA of this gene is only expressed in ver low amounts in the organs where it was detected (light-grown plants).
1619986_s_at	VIT_16s0050g01680	UDP-glucose: anthocyanidin 5,3-O-glucosyltransferase	vv10942Anthocyanin_biosynthesis	PU13288	eugene3.00040275	At3g16520	similar to UDP-glucoronosyl/UDP-glucosyl transferase family protein [Arabidopsis thaliana] (TAIR:AT1G01420.1)
1620688_at	VIT_01s0011g02960	Leucoanthocyanidin reductase 1	vv10941Flavonoid_biosynthesis	PU13089	grail3.0006037601	At1g75290	similar to isoflavone reductase, putative [Arabidopsis thaliana] (TAIR:AT1G75280.1)
1607760_at	VIT_06s0009g02810	Flavonoid 3',5'-hydroxylase	vv10941Flavonoid_biosynthesis	PU12736	eugene3.00030242	At5g07990	Required for flavonoid 3' hydroxylase activity.
1619422_at	VIT_02s0025g04720	Leucoanthocyanidin dioxgenase	vv10941Flavonoid_biosynthesis	PU12918	gw1.I.9239.1	At4g22880	Identical to Leucoanthocyanidin dioxygenase (LDOX) [Arabidopsis Thaliana] (GB:Q96323)
1614191_s_at	VIT_08s0007g04520	Caffeic acid 3-O-methyltransferase	vv10940Phenylpropanoid_biosynthesis	PU23761	estExt_fgenesh4_pm.C_280112	At3g53140	similar to ATOMT1 (O-METHYLTRANSFERASE 1) [Arabidopsis thaliana] (TAIR:AT5G54160.1)
1612281_at	VIT_15s0048g02480	Caffeate 3-O-methyltransferase 1	vv10940Phenylpropanoid_biosynthesis	PU07978	estExt_fgenesh4_pm.C_LG_XII0129	At5g54160	Identical to Quercetin 3-O-methyltransferase 1 (OMT1) [Arabidopsis Thaliana] (GB:Q9FK25
1608603_at	VIT_19s0135g00030	Caffeate 3-O-methyltransferase 1	vv10940Phenylpropanoid_biosynthesis	PU07978	estExt_fgenesh4_pm.C_LG_XII0129	At5g54160	Identical to Quercetin 3-O-methyltransferase 1 (OMT1) [Arabidopsis Thaliana] (GB:Q9FK25
1622638_x_at	VIT_16s0100g00950	Stilbene synthase 3	vv10940Phenylpropanoid_biosynthesis	PU12625	eugene3.00140920	At5g13930	Encodes chalcone synthase (CHS), a key enzyme involved in the biosynthesis of flavonoids. Required for the accumulation of purple anthocyanins in leaves and stems. Also involved in the regulation of auxin transport and the modulation of root gravitropism.
1606770_s_at	VIT_02s0025g00750	Pinoresinol forming dirigent protein	vv10940Phenylpropanoid_biosynthesis	PU01524	estExt_Genewise1_v1.C_LG_I8734	At4g23690	similar to disease resistance-responsive family protein / dirigent family protein [Arabidopsis thaliana] (TAIR:AT1G64160.1)
1607937_at	VIT_15s0021g01060	CYP72A1	vv10902Monoterpenoid_biosynthesis	PU13028	gw1.125.153.1	At5g24910	member of CYP714A
1620850_at	VIT_08s0040g00390	Magnesium-protoporphyrin IX monomethyl ester [oxidative] cyclase	vv10860Porphyrin_and_chlorophyll_metabolism	PU09441	estExt_Genewise1_v1.C_LG_XVI1018	At3g56940	Identical to Magnesium-protoporphyrin IX monomethyl ester [oxidative] cyclase, chloroplast precursor (CRD1) [Arabidopsis Thaliana] (GB:Q9M591
1622565_at	VIT_03s0097g00710	Glutamyl-tRNA reductase 1	vv10860Porphyrin_and_chlorophyll_metabolism	PU08261	gw1.I.4290.1	At1g58290	Encodes a protein with glutamyl-tRNA reductase (GluTR) activity, catalyzing the NADPH-dependent reduction of Glu-tRNA(Glu) to glutamate 1-semialdehyde (GSA) with the release of free tRNA(Glu). It is involved in the early steps of chlorophyll biosynthesis.
1612710_at	VIT_09s0018g01800	Acid phosphatase	vv10740Riboflavin_metabolism	PU24408	estExt_Genewise1_v1.C_LG_I0436	At4g25150	similar to acid phosphatase, putative [Arabidopsis thaliana] (TAIR:AT5G51260.1)
1613337_x_at	VIT_17s0000g03690	Ribulose-1,5-bisphophate carboxylase/oxygenase small subunit	vv10710Carbon_fixation	PU25668	eugene3.01230087	At1g67090	0
1622249_at	VIT_10s0003g03830	S-2-hydroxy-acid oxidase, peroxisomal	vv10630Glyoxylate_and_dicarboxylate_metabolism vv44146Peroxisome	PU10008	estExt_fgenesh4_pg.C_LG_XI0914	At3g14420	Identical to Probable peroxisomal [Arabidopsis Thaliana] (GB:Q9LRR9
1622556_at	VIT_17s0000g02430	Phosphoethanolamine N-methyltransferase	vv10564Glycerophospholipid_metabolism	PU02348	gw1.XII.30.1	At1g48600	Identical to Putative phosphoethanolamine N-methyltransferase 2 (NMT2) [Arabidopsis Thaliana] (GB:Q944H0
1620771_at	VIT_08s0040g00320	Alpha-L-arabinofuranosidase	vv10520Nucleotide_sugars_metabolism	PU26864	gw1.XVI.1041.1	At3g10740	Encodes a bifunctional alpha-l-arabinofuranosidase/beta-d-xylosidase that belongs to family 51 of glycoside hydrolases. It may be involved in cell wall modification.
1616405_at	VIT_05s0029g00420	Nucleotide sugar epimerase	vv10500Starch_and_sucrose_metabolism vv10520Nucleotide_sugars_metabolism vv40006Cell_wall	PU07859	eugene3.00880019	At3g23820	UDP-D-glucuronate 4-epimerase
1619457_at	VIT_19s0014g00300	Alpha,alpha-trehalose-phosphate synthase	vv10500Starch_and_sucrose_metabolism	PU01697	estExt_fgenesh4_pg.C_1680018	At1g78580	Encodes an enzyme putatively involved in trehalose biosynthesis. The protein has a trehalose synthase (TPS)-like domain but no trehalose phosphatase (TPP)-like domain. ATTPS1 is able to complement yeast tps1 mutants in vivo. The gene product modulates cell growth but not cell differentiation by determining cell wall deposition and cell division.
1609324_at	VIT_19s0093g00220	Glutathione S-transferase 8 GSTU19	vv10480Glutathione_metabolism	PU25318	estExt_fgenesh4_pm.C_LG_XI0374	At1g78380	Encodes a glutathione transferase that is a member of Tau GST gene family. Expression is induced by drought stress, oxidative stress, and high doses of auxin and cytokinin. naming convention according to Wagner et al. (2002) The expression of this gene is upregulated by herbicide safeners such as benoxacor and fenclorim.
1620767_at	VIT_01s0011g02200	Glutamine synthetase	vv10251Glutamate_metabolism vv10550Peptidoglycan_biosynthesis vv10910Nitrogen_metabolism	PU02327	estExt_fgenesh4_pm.C_LG_XII0003	At5g37600	encodes a cytosolic glutamine synthetase, the enzyme has high affinity with substrate ammonium
1610655_at	VIT_09s0002g07120	Adenine phosphoribosyltransferase	vv10230Purine_metabolism	PU01418	estExt_fgenesh4_pg.C_LG_VI1808	At5g11160	0
1615459_at	VIT_08s0007g01450	IMP dehydrogenase	vv10230Purine_metabolism	PU04254	grail3.0025007601	At3g54000	similar to unknown protein [Arabidopsis thaliana] (TAIR:AT5G59050.1)
1614593_at	VIT_18s0089g01170	LHCB5 (light harvesting complex of photosystem ii 5)	vv10196Photosynthesis_antenna_proteins vv50105Transport_electron_carriers	PU09468	estExt_Genewise1_v1.C_1250189	At4g10340	photosystem II encoding the light-harvesting chlorophyll a/b binding protein CP26 of the antenna system of the photosynthetic apparatus
1614409_at	VIT_01s0010g03620	LHCA2 (Photosystem I light harvesting complex gene 2)	vv10196Photosynthesis_antenna_proteins vv50105Transport_electron_carriers	PU09715	estExt_fgenesh4_pg.C_LG_III1424	At3g61470	Encodes a component of the light harvesting antenna complex of photosystem I.
1615822_at	VIT_19s0014g03660	LHCII type III, chloroplast precursor	vv10196Photosynthesis_antenna_proteins vv50105Transport_electron_carriers	PU03295	estExt_fgenesh4_kg.C_LG_XI0033	At5g54270	similar to LHCB2.1 (Photosystem II light harvesting complex gene 2.1), chlorophyll binding [Arabidopsis thaliana] (TAIR:AT2G05100.1)
1613428_at	GSVIVT00012553001	Oxygen evolving enhancer 3 (PsbQ)	vv10195Photosynthesis vv50113Thylakoid_targeting_pathway vv50135Primary_active_transporter_cat_D3_to_E2	PU09326	estExt_fgenesh4_pm.C_LG_IV0060	At4g05180	Encodes the PsbQ subunit of the oxygen evolving complex of photosystem II.
1611004_at	VIT_11s0037g00290	Plastocyanin domain-containing protein	vv10195Photosynthesis vv50113Thylakoid_targeting_pathway	PU13102	gw1.VI.2580.1	At4g31840	similar to plastocyanin-like domain-containing protein [Arabidopsis thaliana] (TAIR:AT2G25060.1)
1612195_at	VIT_03s0063g01460	Cytochrome b6f complex subunit (petM)	vv10195Photosynthesis vv50105Transport_electron_carriers	PU23517	grail3.0040016501	At2g26500	similar to unnamed protein product [Vitis vinifera] (GB:CAO61267.1)
1617206_s_at	CB340600	Photosystem I subunit O (PSAO)	vv10195Photosynthesis	PU07164	estExt_Genewise1_v1.C_660408	At1g08380	similar to putative 16kDa membrane protein [Nicotiana tabacum] (GB:CAB75430.1)
1622745_at	GSVIVT00008488001	Quinone reductase	vv10190Oxidative_phosphorylation vv50134Primary_active_transporter_cat_D1	PU02254	grail3.0055008002	At4g27270	similar to FQR1 (FLAVODOXIN-LIKE QUINONE REDUCTASE 1) [Arabidopsis thaliana] (TAIR:AT5G54500.1)
1610456_at	VIT_04s0023g00840	Mitochondrial Acyl carrier protein 2	vv10190Oxidative_phosphorylation vv50134Primary_active_transporter_cat_D1	PU02985	estExt_Genewise1_v1.C_870041	At1g65290	Encodes a member of the mitochondrial acyl carrier protein (ACP) family. As part of the mitochondrial matrix, it is likely to be involved in fatty acid or lipoic acid biogenesis.
1615602_at	VIT_10s0116g01740	ATP synthase gamma chain 1t (ATPC1)	vv10190Oxidative_phosphorylation vv10195Photosynthesis vv50131Primary_active_transporter_cat_A2_to_A4	PU09071	eugene3.00040033	At4g04640	Identical to ATP synthase gamma chain 1, chloroplast precursor (ATPC1) [Arabidopsis Thaliana] (GB:Q01908)
1612781_at	VIT_18s0001g08550	Squalene monooxygenase	vv10100Biosynthesis_of_steroids vv10900Terpenoid_biosynthesis	PU03350	estExt_fgenesh4_pm.C_LG_V0246	At1g58440	Encodes a putative protein that has been speculated, based on sequence similarities, to have squalene monooxygenase activity.
1608252_s_at	VIT_02s0025g04580	Hydroxymethylglutaryl-CoA synthase	vv10072Synthesis_and_degradation_of_ketone_bodies vv10280Valine_leucine_and_isoleucine_degradation vv10650Butanoate_metabolism	PU10885	grail3.0018023901	At4g11820	Encodes a protein with hydroxymethylglutaryl-CoA synthase activity which was characterized by phenotypical complementation of the S. cerevisiae mutant.
1619079_s_at	VIT_12s0057g01200	Acetyl-CoA acetyltransferase, cytosolic 1	vv10071Fatty_acid_metabolism vv10072Synthesis_and_degradation_of_ketone_bodies vv10280Valine_leucine_and_isoleucine_degradation vv10380Tryptophan_metabolism vv10620Pyruvate_metabolism vv10650Butanoate_metabolism	PU11660	estExt_Genewise1_v1.C_LG_XIV3807	At5g48230	0
1610751_at	VIT_06s0004g01770	Acetyl-CoA carboxylase, biotin carboxylase	vv10061Fatty_acid_biosynthesis vv10620Pyruvate_metabolism	PU25798	estExt_fgenesh4_pg.C_LG_I0347	At5g12950	similar to catalytic [Arabidopsis thaliana] (TAIR:AT5G12960.1)
1611086_at	VIT_16s0050g00830	Beta-ketoacyl-CoA synthase	vv10061Fatty_acid_biosynthesis	PU13035	estExt_fgenesh4_pg.C_LG_XV1167	At5g23940	0
1616322_s_at	VIT_05s0020g04510	GDP-mannose 3,5-epimerase 1	vv10053Ascorbate_and_aldarate_metabolism	PU12538	eugene3.00700070	At5g28840	Encodes a protein with GDP-D-mannose 3',5'-epimerase activity. The enzyme is involved in ascorbate biosynthesis. It catalyzes the conversion of GDP-D-mannose to GDP-L-galactose.
1621073_at	VIT_14s0030g02180	GDP-mannose 3,5-epimerase 1	vv10053Ascorbate_and_aldarate_metabolism	PU12538	eugene3.00700070	At5g28840	Encodes a protein with GDP-D-mannose 3',5'-epimerase activity. The enzyme is involved in ascorbate biosynthesis. It catalyzes the conversion of GDP-D-mannose to GDP-L-galactose.
1613017_s_at	VIT_19s0090g01000	VTC2 (vitamin C defective)	vv10053Ascorbate_and_aldarate_metabolism	PU11402	grail3.0032000401	At4g26850	similar to VTC5, galactose-1-phosphate guanylyltransferase (GDP) [Arabidopsis thaliana] (TAIR:AT5G55120.1)
1611613_at	VIT_16s0022g00670	Vacuolar invertase 1, GIN1	vv10052Galactose_metabolism vv10500Starch_and_sucrose_metabolism	PU06645	estExt_fgenesh4_pg.C_LG_III0902	At1g62660	similar to ATBETAFRUCT4/VAC-INV (VACUOLAR INVERTASE), beta-fructofuranosidase/ hydrolase, hydrolyzing O-glycosyl compounds [Arabidopsis thaliana] (TAIR:AT1G12240.1)
1613165_s_at	VIT_16s0100g00290	L-idonate dehydrogenase	vv10051Fructose_and_mannose_metabolism	PU03589	estExt_fgenesh4_pg.C_LG_XII1187	At5g51970	similar to oxidoreductase, zinc-binding dehydrogenase family protein [Arabidopsis thaliana] (TAIR:AT5G63620.1)
1622252_at	VIT_16s0100g00290	L-idonate dehydrogenase	vv10051Fructose_and_mannose_metabolism	PU03589	estExt_fgenesh4_pg.C_LG_XII1187	At5g51970	similar to oxidoreductase, zinc-binding dehydrogenase family protein [Arabidopsis thaliana] (TAIR:AT5G63620.1)
1610218_s_at	VIT_01s0011g00690	UDP-glucose 6-dehydrogenase	vv10040Pentose_glucuronate_interconversion vv10500Starch_and_sucrose_metabolism vv10520Nucleotide_sugars_metabolism vv40006Cell_wall	PU00484	eugene3.00041110	At5g15490	similar to UDP-glucose 6-dehydrogenase, putative [Arabidopsis thaliana] (TAIR:AT3G29360.1)
1621034_at	GSVIVT00011154001	Phosphoenolpyruvate carboxykinase	vv10020Citrate_cycle vv10620Pyruvate_metabolism vv10710Carbon_fixation	PU21725	estExt_fgenesh4_pg.C_LG_II0983	At4g37870	Encodes a putative phosphoenolpyruvate carboxykinase (ATP-dependent).
1620184_at	VIT_03s0088g01190	Malate dehydrogenase, glyoxysomal precursor	vv10020Citrate_cycle vv10620Pyruvate_metabolism vv10630Glyoxylate_and_dicarboxylate_metabolism vv10710Carbon_fixation vv10720Reductive_carboxylate_cycle	PU08271	grail3.0001073802	At5g09660	encodes a microbody NAD-dependent malate dehydrogenase encodes an peroxisomal NAD-malate dehydrogenase that is involved in fatty acid beta-oxidation through providing NAD to the process of converting fatty acyl CoA to acetyl CoA.
1613332_at	VIT_03s0088g01190	Malate dehydrogenase, glyoxysomal precursor	vv10020Citrate_cycle vv10620Pyruvate_metabolism vv10630Glyoxylate_and_dicarboxylate_metabolism vv10710Carbon_fixation vv10720Reductive_carboxylate_cycle	PU08271	grail3.0001073802	At5g09660	encodes a microbody NAD-dependent malate dehydrogenase encodes an peroxisomal NAD-malate dehydrogenase that is involved in fatty acid beta-oxidation through providing NAD to the process of converting fatty acyl CoA to acetyl CoA.
1618024_at	VIT_14s0066g01550	Aldehyde dehydrogenase 1 precursor	vv10010Glycolysis vv10071Fatty_acid_metabolism vv10220Urea_cycle_and_metabolism_of_amino_groups vv10280Valine_leucine_and_isoleucine_degradation vv10340Histidine_metabolism vv10410Beta-alanine_metabolism vv10561Glycerolipid_metabolism vv10620Pyruvate_metabolism	PU02859	estExt_fgenesh4_pm.C_LG_II0915	At1g23800	Encodes a mitochondrial aldehyde dehydrogenase
1614156_at	VIT_08s0007g01570	fructose 1,6-bisphosphatase	vv10010Glycolysis vv10030Pentose_phosphate vv10051Fructose_and_mannose_metabolism vv10710Carbon_fixation	PU09376	estExt_Genewise1_v1.C_LG_XVI3399	At3g54050	Identical to Fructose-1,6-bisphosphatase, chloroplast precursor (FBP) [Arabidopsis Thaliana] (GB:P25851
1621944_at	VIT_04s0023g03010	fructose-bisphosphate aldolase, chloroplast precursor	vv10010Glycolysis vv10030Pentose_phosphate vv10051Fructose_and_mannose_metabolism vv10710Carbon_fixation	PU11555	estExt_fgenesh4_pm.C_LG_IX0211	At4g38970	Identical to Probable fructose-bisphosphate aldolase 2, chloroplast precursor (FBA2) [Arabidopsis Thaliana] (GB:Q944G9
1615814_at	VIT_01s0010g02460	Glyceraldehyde-3-phosphate dehydrogenase, cytosolic 3	vv10010Glycolysis	PU01445	estExt_fgenesh4_pg.C_LG_X0484	At3g04120	encodes cytosolic GADPH (C subunit) involved in the glycolytic pathway but also interacts with H2O2 potentially placing it in a signalling cascade induced by ROS.
1615481_at	VIT_18s0001g09400	Cytochrome b5 DIF-F	0	PU20977	estExt_Genewise1_v1.C_401069	At5g48810	similar to B5 #4 (cytochrome b5 family protein #4), heme binding / transition metal ion binding [Arabidopsis thaliana] (TAIR:AT2G32720.1)
1615762_at	VIT_01s0127g00590	Protein disulfide isomerase	0	PU09267	estExt_fgenesh4_pg.C_LG_V1578	At1g60420	similar to electron carrier [Arabidopsis thaliana] (TAIR:AT4G31240.1)
1615926_at	CB345868	Thioredoxin M-type	0	PU02636	gw1.107.137.1	At3g15360	encodes a prokaryotic thioredoxin
1614178_at	VIT_08s0007g00840	Ribulose bisphosphate carboxylase/oxygenase activase, chloroplast	0	PU08719	gw1.X.2081.1	At2g39730	Identical to Ribulose bisphosphate carboxylase/oxygenase activase, chloroplast precursor (RCA) [Arabidopsis Thaliana] (GB:P10896
1616918_s_at	VIT_06s0004g05180	Ribulose bisphosphate carboxylase/oxygenase activase, chloroplast	0	PU08719	gw1.X.2081.1	At2g39730	Identical to Ribulose bisphosphate carboxylase/oxygenase activase, chloroplast precursor (RCA) [Arabidopsis Thaliana] (GB:P10896
1608056_at	VIT_07s0104g00960	Histone H2AXb HTA3	0	PU24825	estExt_Genewise1_v1.C_LG_XIII1180	At1g54690	Encodes HTA3, a histone H2A protein. H2AX is a meiosis-specific isoform of histone H2A. Upon DSB formation, rapid accumulation of phosphorylated H2AX (?
1611328_at	VIT_00s0179g00340	Histone H2A variant 1 HTA11	0	PU00721	estExt_fgenesh4_pg.C_LG_V1315	At3g54560	Encodes HTA11, a histone H2A protein.
1616345_at	VIT_11s0037g00740	Serine carboxypeptidase S10	0	PU12645	fgenesh4_pg.C_LG_XVIII000903	At4g30810	0
1607999_s_at	VIT_11s0016g01070	Cathepsin H	0	PU26894	grail3.0028002001	At3g45310	Identical to Thiol protease aleurain-like precursor [Arabidopsis Thaliana] (GB:Q8RWQ9
1611656_s_at	VIT_03s0038g00280	Cysteine proteinase	0	PU07684	grail3.0045008602	At4g39090	Similar to cysteine proteinases, induced by desiccation but not abscisic acid.
1618357_at	VIT_01s0150g00060	SOUL heme-binding	0	PU03610	grail3.0005014101	At1g17100	similar to SOUL heme-binding family protein [Arabidopsis thaliana] (TAIR:AT1G78450.1)
1608571_s_at	GSVIVT00011190001	Protease inhibitor/seed storage/lipid transfer protein (LTP)	0	PU02011	estExt_fgenesh4_pg.C_LG_II2492	At5g48485	encodes a putative apoplastic lipid transfer protein that is involved in systemic acquired resistance. Mutants in this gene exhibit wild-type local resistance to avirulent and virulent Pseudomonas syringae, but pathogenesis-related gene expression is abolished in uninoculated distant leaves and fail to develop SAR to virulent Pseudomonas or Peronospora parasitica.
1613197_at	VIT_00s0338g00030	Cellular retinaldehyde-binding/triple function, C-terminal	0	PU23261	estExt_fgenesh4_pm.C_LG_II0071	At4g35750	similar to unknown protein [Arabidopsis thaliana] (TAIR:AT3G10210.1)
1611669_at	VIT_05s0062g00780	Rho GDP-dissociation inhibitor 2	0	PU00087	gw1.II.1011.1	At3g07880	Identical to Rho GDP-dissociation inhibitor 1 (GDI1) [Arabidopsis Thaliana] (GB:Q9SFC6)
1617552_at	VIT_04s0023g03860	Rac-like GTP-binding protein ARAC1 precursor (GTPase protein ROP3)	0	PU06336	estExt_fgenesh4_pg.C_LG_V1555	At2g17800	A member of ROP GTPase family. Rac-like GTP-binding protein ARAC1/ATGP2. Encodes a geranylgeranylated GTP binding protein. Involved in the auxin-activated 26S proteasome-dependent Aux/IAA proteolysis pathway.
1621455_at	VIT_08s0007g04150	RKL1 (Receptor-like kinase 1)	0	PU07479	eugene3.00280292	At2g36570	similar to leucine-rich repeat transmembrane protein kinase, putative [Arabidopsis thaliana] (TAIR:AT1G68400.1)
1618871_at	VIT_03s0038g02170	Thaumatin	0	PU25206	estExt_Genewise1_v1.C_LG_IX1261	At4g38660	similar to unknown protein [Arabidopsis thaliana] (TAIR:AT4G24180.1)
1621818_at	VIT_04s0008g03950	RD22	0	PU23874	estExt_Genewise1_v1.C_LG_XIX0239	At5g25610	Identical to Dehydration-responsive protein RD22 precursor (RD22) [Arabidopsis Thaliana] (GB:Q08298)
1611979_at	VIT_02s0033g01120	Dehydration-responsive protein	0	PU00437	estExt_fgenesh4_pg.C_290313	At1g31850	similar to ERD3 (EARLY-RESPONSIVE TO DEHYDRATION 3) [Arabidopsis thaliana] (TAIR:AT4G19120.2)
1619613_at	VIT_02s0154g00320	Protease inhibitor/seed storage/lipid transfer protein (LTP)	0	PU26338	grail3.0013041501	At2g45180	similar to protease inhibitor/seed storage/lipid transfer protein (LTP) family protein [Arabidopsis thaliana] (TAIR:AT1G62510.1)
1611063_at	VIT_19s0140g00210	SOUL heme-binding	0	PU03610	grail3.0005014101	At1g17100	similar to SOUL heme-binding family protein [Arabidopsis thaliana] (TAIR:AT1G78450.1)
1622009_at	VIT_00s0357g00100	Pollen Ole e 1 allergen and extensin	0	PU01910	estExt_Genewise1_v1.C_LG_II1134	At4g08685	similar to pollen Ole e 1 allergen and extensin family protein [Arabidopsis thaliana] (TAIR:AT1G78040.1)
1613266_at	VIT_17s0000g05650	Unknown protein	0	PU03181	gw1.129.1.1	At1g74730	similar to unknown [Populus trichocarpa x Populus deltoides] (GB:ABK96654.1)
1611563_at	VIT_01s0010g03870	Unknown protein	0	PU21838	eugene3.00031400	At3g48660	similar to unknown protein [Arabidopsis thaliana] (TAIR:AT5G63500.1)
1619580_at	VIT_06s0004g02980	Kelch repeat-containing F-box protein	0	PU06479	fgenesh4_pg.C_LG_XIX000486	At5g60570	similar to kelch repeat-containing F-box family protein [Arabidopsis thaliana] (TAIR:AT1G26930.1)
1608437_s_at	VIT_17s0000g03800	Unknown protein	0	PU10853	eugene3.03100006	At1g73885	similar to unnamed protein product [Vitis vinifera] (GB:CAO68046.1)
1616444_at	VIT_06s0004g03390	TET3 (tetraspanin3)	0	PU02405	estExt_fgenesh4_pm.C_LG_IX0680	At3g45600	similar to TET4 (TETRASPANIN4) [Arabidopsis thaliana] (TAIR:AT5G60220.1)
1617280_s_at	VIT_06s0080g00760	Unknown protein	0	PU08683	estExt_fgenesh4_pg.C_LG_IX1364	At5g22430	similar to unknown protein [Arabidopsis thaliana] (TAIR:AT2G27385.1)
1617390_at	VIT_05s0020g02890	GPI-anchored protein-like protein II	0	PU07845	gw1.VIII.44.1	At3g06035	Identical to Uncharacterized GPI-anchored protein At3g06035 precursor [Arabidopsis Thaliana] (GB:Q84MC0
1621735_at	VIT_18s0001g12090	Unknown protein	0	PU23589	eugene3.00041151	At1g47740	similar to unknown protein [Arabidopsis thaliana] (TAIR:AT5G25170.1)
1607564_at	VIT_05s0020g01820	Integral membrane family protein UPF0497	0	PU23307	estExt_fgenesh4_pg.C_LG_VIII1848	At4g15630	Identical to UPF0497 membrane protein At4g15630 [Arabidopsis Thaliana] (GB:Q8L8Z1
1612538_at	VIT_09s0002g04240	Membrane protein	0	PU22039	eugene3.00570191	At2g25737	similar to unknown protein [Arabidopsis thaliana] (TAIR:AT2G36630.1)
1618324_s_at	VIT_03s0180g00110	Stress enhanced protein 1 (SEP1)	0	PU09851	estExt_fgenesh4_pg.C_LG_I2581	At4g34190	similar to stress enhanced protein 1 [Brassica rapa] (GB:ABV89639.1)
1606839_at	VIT_18s0001g05700	Unknown protein	0	PU25811	eugene3.01500034	At5g49900	similar to catalytic [Arabidopsis thaliana] (TAIR:AT1G33700.2)
1616686_at	VIT_18s0001g01210	Senescence-inducible chloroplast stay-green protein 2	0	PU02220	gw1.II.1790.1	At1g44000	similar to unknown protein [Arabidopsis thaliana] (TAIR:AT4G11911.1)
1618352_at	VIT_13s0064g00040	Unknown protein	0	PU06729	estExt_fgenesh4_pg.C_LG_IX1012	At3g52040	similar to unnamed protein product [Vitis vinifera] (GB:CAO40759.1)
1617440_at	VIT_12s0055g01140	Lipid transfer protein	0	PU02355	gw1.III.1424.1	At5g64080	Identical to Non-specific lipid-transfer protein-like protein At5g64080 precursor [Arabidopsis Thaliana] (GB:Q8VYI9
1609915_at	VIT_14s0030g00450	Histone H2AXb HTA3	0	PU24825	estExt_Genewise1_v1.C_LG_XIII1180	At1g54690	Encodes HTA3, a histone H2A protein. H2AX is a meiosis-specific isoform of histone H2A. Upon DSB formation, rapid accumulation of phosphorylated H2AX (?

## Sheet: Arabidopsis seed
Supplementary Table 6 G. Differentially expressed gene set in common between V. riparia short day (VRS) induced bud dormancy and genes up-regulated in Arabidopsis seed dormancy (Cadman et al. 2006). VRS upregulated are in unshaded (top of table) and VRS down regulated are in shaded (bottom).
VRS				Arabidopsis seed
Probeset	Unique ID	Functional annotation	VitisNet Molecular Network (Grimplet et al. 2012)	Best arabidopsis match	TAIR Annotation
1606895_at	VIT_18s0122g01340	BTB/POZ domain-containing protein	vv60093TRAF	AT2G30600	BTB/POZ domain-containing protein contains Pfam PF00651: BTB/POZ domain; contains Interpro IPR000210/ PS50097: BTBB/POZ domain; similar to MigA (GI:1841872) [Dictyostelium discoideum]
1617414_at	VIT_04s0008g04480	Zinc finger (C3HC4-type ring finger)	vv60078Other_zf-C3HC4	AT5G25560	zinc finger (C3HC4-type RING finger) family protein contains Pfam domain PF00097: Zinc finger, C3HC4 type (RING finger)
1609172_at	VIT_19s0014g03290	NAC domain containing protein 19	vv60046NAC	AT4G27410	no apical meristem (NAM) family protein (RD26) contains Pfam PF02365: No apical meristem (NAM) domain; Arabidopsis thaliana nap gene,PID:e1234813; identical to cDNA RD26 mRNA for NAM-like protein GI:15375403
1608709_at	VIT_06s0004g04980	Scarecrow transcription factor 14 (SCL14)	vv60032GRAS	AT1G07530	scarecrow-like transcription factor 14 (SCL14) identical to GB:AAD24412 from [Arabidopsis thaliana]
1615871_at	VIT_10s0003g04650	Nuclear transcription factor Y subunit A-7	vv60021CCAAT	AT1G30500	CCAAT-binding transcription factor (CBF-B/NF-YA) family protein contains Pfam profile: PF02045 CCAAT-binding transcription factor (CBF-B/NF-YA)
1612725_at	VIT_08s0007g02240	Calcium/proton exchanger CAX3	vv50123Porters_cat_18_to_29	AT3G51860	cation exchanger, putative (CAX3) similar to high affinity calcium antiporter CAX1 [Arabidopsis thaliana] gi|9256741|gb|AAB05913; Ca2+:Cation Antiporter (CaCA) Family member PMID:11500563; non-consensus AT-acceptor splice site at intron 1
1607451_at	VIT_08s0056g00730	SEC14 cytosolic factor	vv50122Porters_cat_7_to_17	AT1G22180	SEC14 cytosolic factor family protein / phosphoglyceride transfer family protein contains Pfam profile: PF00650 CRAL/TRIO domain; similar to polyphosphoinositide binding protein Ssh1p (GI:|2739044) {Glycine max}; similar to Phosphatidylinositol Transfer Protein Sec14p (GI:2780955) [Saccharomyces cerevisiae]
1608772_at	VIT_07s0005g03290	Inorganic phosphate transporter 1-4	vv50121Porters_cat_1_to_6	AT2G38940	phosphate transporter (PT2) identical to phosphate transporter (AtPT2) [Arabidopsis thaliana] GI:1502430
1615503_at	VIT_17s0000g07190	Heat shock protein 101	vv50109Incompletely_characterized_transport_systems	AT1G74310	heat shock protein 101 (HSP101) identical to heat shock protein 101 GI:6715468 GB:AAF26423 from [Arabidopsis thaliana]];[AT1G74300, esterase/lipase/thioesterase family protein low similarity to 2-hydroxy-6-oxo-6-phenylhexa-2,4-dienoate hydrolase [Rhodococcus sp. RHA1] GI:8978311; contains Interpro entry IPR000379]
1614448_at	VIT_04s0008g05870	CLPB-M/CLPB4/HSP98.7	vv50109Incompletely_characterized_transport_systems	AT2G25140	heat shock protein 100, putative / HSP100, putative / heat shock protein clpB, putative / HSP100/ClpB, putative similar to HSP100/ClpB GI:9651530 [Phaseolus lunatus]
1615541_s_at	VIT_15s0048g02860	Auxin-responsive SAUR29	vv30003Auxin_signaling	AT2G46690	auxin-responsive family protein similar to indole-3-acetic acid induced protein ARG7 (SP:P32295) [Phaseolus aureus]
1607503_s_at	VIT_10s0003g00090	DRM1 dormancy/auxin associated	vv30003Auxin_signaling	AT1G28330	dormancy-associated protein, putative (DRM1) identical to dormancy-associated protein [Arabidopsis thaliana] GI:2995990; similar to dormancy-associated protein GI:2605887 from [Pisum sativum]; contains Pfam profile PF05564: Dormancy/auxin associated protein
1609591_at	VIT_16s0098g01150	Auxin-responsive SAUR29	vv30003Auxin_signaling	AT2G46690	auxin-responsive family protein similar to indole-3-acetic acid induced protein ARG7 (SP:P32295) [Phaseolus aureus]
1619145_s_at	VIT_13s0047g00250	EIN3	vv30001ABA_signaling vv30008Ethylene_signaling vv30009Flower_development vv60027EIL	AT3G20770	ethylene-insensitive 3 (EIN3) identical to ethylene-insensitive3 GI:2224933 from [Arabidopsis thaliana]
1621709_at	VIT_05s0020g03330	Heat shock protein 70	vv23040Spliceosome vv24141Protein_processing_in_endoplasmic_reticulum vv50101Channels_and_pores	AT2G32120	heat shock protein 70 family protein / HSP70 family protein similar to SP|P22953 Heat shock cognate 70 kDa protein 1 (Hsc70.1) {Arabidopsis thaliana}; contains InterPro accession IPR001023: Heat shock protein Hsp70
1616961_at	VIT_06s0004g06790	Gibberellin 2-beta-dioxygenase 7	vv10904Diterpenoid_biosynthesis	AT5G58660	oxidoreductase, 2OG-Fe(II) oxygenase family protein similar to ACC oxidase, Lycopersicon esculentum [SP|P05116], gibberellin 3B-hydroxylase, Latuca sativa [gi:4164145]; contains Pfam domain PF03171, 2OG-Fe(II) oxygenase superfamily
1608916_at	VIT_01s0127g00680	SRO2 (similar to rcd one 2)	vv10760Nicotinate_and_nicotinamide_metabolism	AT1G23550	expressed protein
1616279_at	VIT_01s0127g00680	SRO2 (similar to rcd one 2)	vv10760Nicotinate_and_nicotinamide_metabolism	AT1G23550	expressed protein
1616574_at	VIT_18s0001g14980	3-methyl-2-oxobutanoate dehydrogenase	vv10280Valine_leucine_and_isoleucine_degradation	AT1G21400	2-oxoisovalerate dehydrogenase, putative / 3-methyl-2-oxobutanoate dehydrogenase, putative / branched-chain alpha-keto acid dehydrogenase E1 alpha subunit, putative similar to branched-chain alpha-keto acid dehydrogenase E1-alpha subunit [Gallus gallus] GI:12964598; contains Pfam profile PF00676: Dehydrogenase E1 component];[AT5G34780, dehydrogenase E1 component family protein similar to SP|P5013…
1611875_at	VIT_02s0025g02560	O-succinylhomoserine sulfhydrylase	vv10271Methionine_metabolism vv10272Cysteine_metabolism vv10450Selenoamino_acid_metabolism vv10920Sulfur_metabolism	AT1G64660	Cys/Met metabolism pyridoxal-phosphate-dependent enzyme family protein similar to SP|P13254 Methionine gamma-lyase (EC 4.4.1.11) (L-methioninase) {Pseudomonas putida}; contains Pfam profile PF01053: Cys/Met metabolism PLP-dependent enzyme
1618333_at	VIT_05s0020g03860	Homocysteine S-methyltransferase 3	vv10271Methionine_metabolism	AT3G22740	homocysteine S-methyltransferase 3 (HMT-3) identical to homocysteine S-methyltransferase HMT-3 [Arabidopsis thaliana] GI:9966515; similar to homocysteine S-methyltransferase AtHMT-2 (GI:6685163) [Arabidopsis thaliana]; similar to selenocysteine methyltransferase GB:P56707 from [Astragalus bisulcatus]
1621902_at	VIT_07s0005g01970	Galactinol synthase	vv10052Galactose_metabolism	AT2G47180	galactinol synthase, putative similar to galactinol synthase, isoform GolS-1 GI:5608497 from [Ajuga reptans]
1616448_at	VIT_14s0060g00810	Galactinol synthase	vv10052Galactose_metabolism	AT2G47180	galactinol synthase, putative similar to galactinol synthase, isoform GolS-1 GI:5608497 from [Ajuga reptans]
1614186_at	VIT_14s0066g00410	Aldose 1-epimerase	vv10010Glycolysis	AT5G14500	aldose 1-epimerase family protein similar to apospory-associated protein C, Chlamydomonas reinhardtii, EMBL:AF195243 Pfam profile PF01263: Aldose 1-epimerase
1622407_at	VIT_08s0007g04000	Unknown protein	0	AT3G10020	expressed protein
1622372_s_at	GSVIVT00032572001	Unknown protein	0	AT2G25625	expressed protein
1615766_at	VIT_18s0001g02690	Unknown protein	0	AT1G44414	hypothetical protein
1611316_at	VIT_05s0020g03530	Late embryogenesis abundant protein D-34 (LEA D-34)	0	AT3G22490	late embryogenesis abundant protein, putative / LEA protein, putative similar to LEA protein in group 5 (AtECP31) [Arabidopsis thaliana] GI:1526422; contains Pfam profile PF04927: Seed maturation protein
1620890_at	VIT_13s0067g01250	Em protein GEA6 (EM6)	0	AT2G40170	Em-like protein GEA6 (EM6) identical toSP|Q02973 Em-like protein GEA6 {Arabidopsis thaliana}; contains Pfam profile PF00477: Small hydrophilic plant seed protein
1614496_at	VIT_09s0002g08660	F-box protein (FBL14)	0	AT1G80570	F-box family protein (FBL14) contains similarity to F-box protein FBL2 GI:6063090 from [Homo sapiens]
1615720_s_at	VIT_08s0105g00270	NC domain-containing protein	0	AT5G06370	NC domain-containing protein contains Pfam domain, PF04970: NC domain
1614158_at	VIT_06s0004g03530	Nitrate excretion transporter1	vv50122Porters_cat_7_to_17	AT3G45650	proton-dependent oligopeptide transport (POT) family protein contains Pfam profile: PF00854 POT family
1614207_at	VIT_06s0004g06830	Asparagine synthetase	vv10910Nitrogen_metabolism	AT3G47340	asparagine synthetase 1 [glutamine-hydrolyzing] / glutamine-dependent asparagine synthetase 1 (ASN1) identical to SP|P49078 Asparagine synthetase [glutamine-hydrolyzing] (EC 6.3.5.4) (Glutamine- dependent asparagine synthetase) {Arabidopsis thaliana}
1612625_at	VIT_00s0524g00010	Armadillo/beta-catenin repeat protein / U-box domain-containing protein	0	AT3G07360	armadillo/beta-catenin repeat family protein / U-box domain-containing protein contains Pfam domain, PF00514: Armadillo/beta-catenin-like repeats and Pfam, PF04564: U-box domain
1612379_at	VIT_06s0004g01550	Phosphoribosylanthranilate transferase	vv10400Phenylalanine_tyrosine_and_tryptophan_biosynthesis	AT3G57880	C2 domain-containing protein contains INTERPRO:IPR000008 C2 domain
1621280_at	VIT_01s0011g05470	PGPS/D12	0	AT1G14870	expressed protein similar to PGPS/D12 [Petunia x hybrida] GI:4105794; contains Pfam profile PF04749: Protein of unknown function, DUF614
1607681_at	VIT_05s0049g00940	Inorganic phosphate transporter 1-4	vv50121Porters_cat_1_to_6	AT2G38940	phosphate transporter (PT2) identical to phosphate transporter (AtPT2) [Arabidopsis thaliana] GI:1502430
1611445_at	VIT_17s0000g08770	Cysteine-rich receptor-like protein kinase 2	0	AT1G70520	protein kinase family protein contains Pfam domain, PF00069: Protein kinase domain
1613429_s_at	VIT_07s0031g00920	Inositol-3-phosphate synthase	vv10562Inositol_phosphate_metabolism	AT2G22240	inositol-3-phosphate synthase isozyme 2 / myo-inositol-1-phosphate synthase 2 / MI-1-P synthase 2 / IPS 2 identical to SP|Q38862 Myo-inositol-1-phosphate synthase isozyme 2 (EC 5.5.1.4) (MI-1-P synthase 2) (IPS 2) {Arabidopsis thaliana}
1607338_at	VIT_07s0031g00920	Inositol-3-phosphate synthase	vv10562Inositol_phosphate_metabolism	AT2G22240	inositol-3-phosphate synthase isozyme 2 / myo-inositol-1-phosphate synthase 2 / MI-1-P synthase 2 / IPS 2 identical to SP|Q38862 Myo-inositol-1-phosphate synthase isozyme 2 (EC 5.5.1.4) (MI-1-P synthase 2) (IPS 2) {Arabidopsis thaliana}
1608268_at	VIT_05s0077g01300	Aldo-keto reductase	vv10040Pentose_glucuronate_interconversion vv10051Fructose_and_mannose_metabolism vv10052Galactose_metabolism vv10561Glycerolipid_metabolism vv10620Pyruvate_metabolism	AT4G24220	expressed protein protein induced upon wounding - Arabidopsis thaliana, PID:e257749];[AT4G24230, acyl-CoA binding protein, putative / ACBP, putative contains similarity to acyl-CoA binding protein 2 [Arabidopsis thaliana] gi|12039034|gb|AAG46057]
